# Supplementary material for: Cyclic Tetrapeptides with Synergistic Antifungal Activity from the Fungus Aspergillus westerdijkiae Using LC-MS/MS-Based Molecular Networking
Source: MDPI journal article supplement (doi:10.3390/antibiotics11020166), 2022-01-27
Supplement: s1 [file s1]

## Supplementary Materials

# Cyclic Tetrapeptides with Synergistic Antifungal Activity from the Fungus *Aspergillus westerdijkiae* Using LC-MS/MS-Based Molecular Networking

Junjie Han <sup>1,†</sup>, Hanying Wang <sup>1,2,†</sup>, Rui Zhang <sup>1</sup>, Huanqin Dai <sup>1,3</sup>, Baosong Chen <sup>1</sup>,  
Tao Wang <sup>1</sup>, Jingzu Sun <sup>1</sup>, Wenzhao Wang <sup>1</sup>, Fuhang Song <sup>4</sup>, Erwei Li <sup>5</sup>, Zhitang Lyu <sup>2,\*</sup>  
and Hongwei Liu <sup>1,3,\*</sup>

<sup>1</sup> State Key Laboratory of Mycology, Institute of Microbiology, Chinese Academy of Sciences, Beijing 100101, China; hanjj@im.ac.cn (J.H.); whanying2021@163.com (H.W.); raynaymond@outlook.com (R.Z.); daihq@im.ac.cn (H.D.); chenbs@im.ac.cn (B.C.); wangtao@im.ac.cn (T.W.); sunjz@im.ac.cn (J.S.); wangwz@im.ac.cn (W.W.)

<sup>2</sup> School of Life Sciences, Institute of Life Science and Green Development, Hebei University, Baoding 071002, China

<sup>3</sup> Savaid Medical School, University of Chinese Academy of Sciences, Beijing 100049, China

<sup>4</sup> School of Light Industry, Beijing Technology and Business University, Beijing 100048, China; songfuhang@btbu.edu.cn

<sup>5</sup> Institutional Center for Shared Technologies and Facilities, Institute of Microbiology, Chinese Academy of Sciences, Beijing 100101, China; liew@im.ac.cn

\* Correspondence: lzt325@sina.com (Z.L.); liuhw@im.ac.cn (H.L.); Tel.: +86-10-64806074 (H.L.)

† These authors contributed equally to this work.

## Contents

|                   |                                                                                                                                            |           |
|-------------------|--------------------------------------------------------------------------------------------------------------------------------------------|-----------|
| <b>Table S1</b>   | Culture media with different compositions and conditions for <i>A. westerdijkiae</i> .                                                     | Page S3   |
| <b>Figure S1</b>  | The molecular network obtained by combining the LC-MS/MS analyses of rice fermentation extract extracts from <i>A. westerdijkiae</i> L1295 | Page S4   |
| <b>Figure S2</b>  | Cyclic tetrapeptides -cluster and the MS/MS spectrum of each node                                                                          | Page S5-7 |
| <b>Figure S3</b>  | The cluster corresponding to compounds observed in the molecular networking                                                                | Page S8   |
| <b>Figure S4</b>  | The ESI-MS/MS spectrum of <b>1</b>                                                                                                         | Page S9   |
| <b>Figure S5</b>  | The ESI-MS/MS spectrum of <b>2</b>                                                                                                         | Page S10  |
| <b>Figure S6</b>  | Advanced Marfey's analysis of compound <b>2</b> .                                                                                          | Page S11  |
| <b>Figure S7</b>  | Phylogenetic analysis and morphological characters of <i>A. westerdijkiae</i> L1295                                                        | Page S12  |
| <b>Figure S8</b>  | <sup>1</sup> H NMR spectrum of westertide A ( <b>1</b> ) in pyridine- <i>d</i> <sub>5</sub> (500 MHz)                                      | Page S13  |
| <b>Figure S9</b>  | <sup>13</sup> C NMR spectrum of westertide A ( <b>1</b> ) in pyridine- <i>d</i> <sub>5</sub> (125 MHz)                                     | Page S14  |
| <b>Figure S10</b> | <sup>1</sup> H- <sup>1</sup> H COSY spectrum of westertide A ( <b>1</b> ) in pyridine- <i>d</i> <sub>5</sub>                               | Page S15  |
| <b>Figure S11</b> | HSQC spectrum of westertide A ( <b>1</b> ) in pyridine- <i>d</i> <sub>5</sub>                                                              | Page S16  |
| <b>Figure S12</b> | HMBC spectrum of westertide A ( <b>1</b> ) in pyridine- <i>d</i> <sub>5</sub>                                                              | Page S17  |
| <b>Figure S13</b> | ROESY spectrum of westertide A ( <b>1</b> ) in pyridine- <i>d</i> <sub>5</sub>                                                             | Page S18  |
| <b>Figure S14</b> | <sup>1</sup> H NMR spectrum of westertide B ( <b>2</b> ) in pyridine- <i>d</i> <sub>5</sub> (500 MHz)                                      | Page S19  |
| <b>Figure S15</b> | <sup>13</sup> C NMR spectrum of westertide B ( <b>2</b> ) in pyridine- <i>d</i> <sub>5</sub> (125 MHz)                                     | Page S20  |
| <b>Figure S16</b> | <sup>1</sup> H- <sup>1</sup> H COSY spectrum of westertide B ( <b>2</b> ) in pyridine- <i>d</i> <sub>5</sub>                               | Page S21  |
| <b>Figure S17</b> | HSQC spectrum of westertide B ( <b>2</b> ) in pyridine- <i>d</i> <sub>5</sub>                                                              | Page S22  |
| <b>Figure S18</b> | HMBC spectrum of westertide B ( <b>2</b> ) in pyridine- <i>d</i> <sub>5</sub>                                                              | Page S23  |
| <b>Figure S19</b> | ROESY spectrum of westertide B ( <b>2</b> ) in pyridine- <i>d</i> <sub>5</sub>                                                             | Page S24  |

**Table S1.** Culture media with different compositions and conditions for *A. westerdijkiae*.

|   |                                  | Medium compositions                                                                                                                                                                                                                                                                                                                                                                                                                                                       | Conditions      |         |
|---|----------------------------------|---------------------------------------------------------------------------------------------------------------------------------------------------------------------------------------------------------------------------------------------------------------------------------------------------------------------------------------------------------------------------------------------------------------------------------------------------------------------------|-----------------|---------|
| 1 | Rice medium                      | 80 g rice/60 mL distilled wate                                                                                                                                                                                                                                                                                                                                                                                                                                            | 25°C            | 3 weeks |
| 2 | wheat medium                     | 80 g wheat/60 mL distilled wate                                                                                                                                                                                                                                                                                                                                                                                                                                           | 25°C            | 3 weeks |
| 3 | Aspergillus Minimal Medium (AMM) | MgSO <sub>4</sub> 0.24g; NaNO <sub>3</sub> 6g; KCl 0.52g; KH <sub>2</sub> PO <sub>4</sub> 0.815; K <sub>2</sub> HPO <sub>4</sub> 1.05g; FeSO <sub>4</sub> ·7H <sub>2</sub> O 5mg; EDTA 0.05g; ZnSO <sub>4</sub> ·7H <sub>2</sub> O 22mg; H <sub>3</sub> BO <sub>3</sub> 11mg; MnCl <sub>2</sub> ·7H <sub>2</sub> O 5mg; CuSO <sub>4</sub> ·5H <sub>2</sub> O 1.6mg; (NH <sub>4</sub> ) <sub>6</sub> MO <sub>7</sub> O <sub>24</sub> ·7H <sub>2</sub> O 1.1mg; Dextrose 1g | 25°C<br>180 rpm | 2 weeks |
| 4 | PDB                              | Potato Dextrose Broth 24 g in 1L distilled water                                                                                                                                                                                                                                                                                                                                                                                                                          | 25°C<br>180 rpm | 2 weeks |

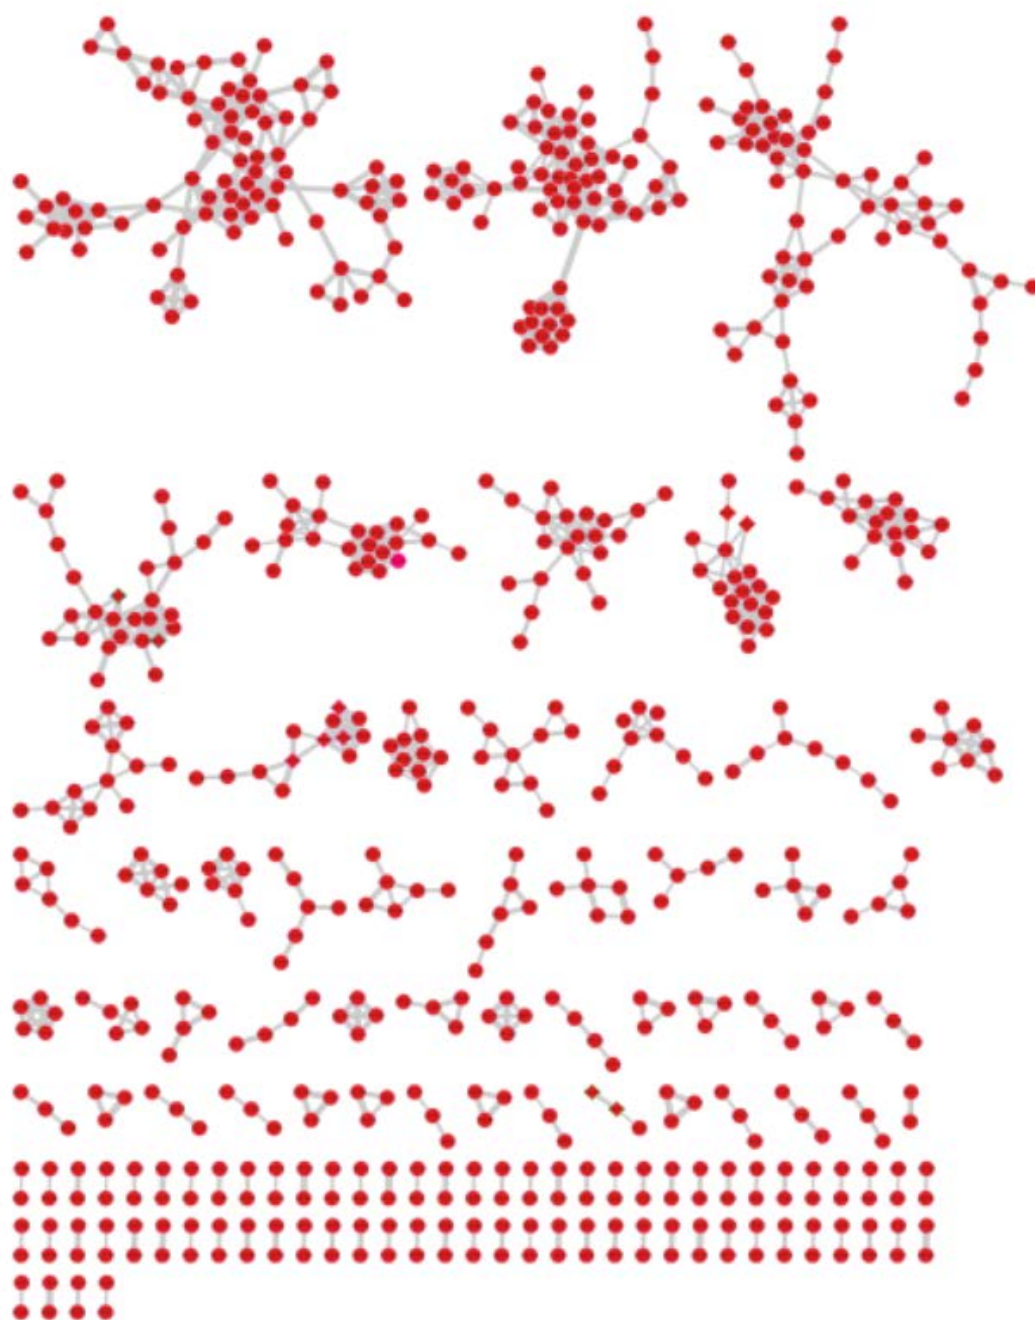

**Figure S1.** The molecular network obtained by combining the LC-MS/MS analyses of rice fermentation extract extracts from *A. Westerdijkiae* L1295

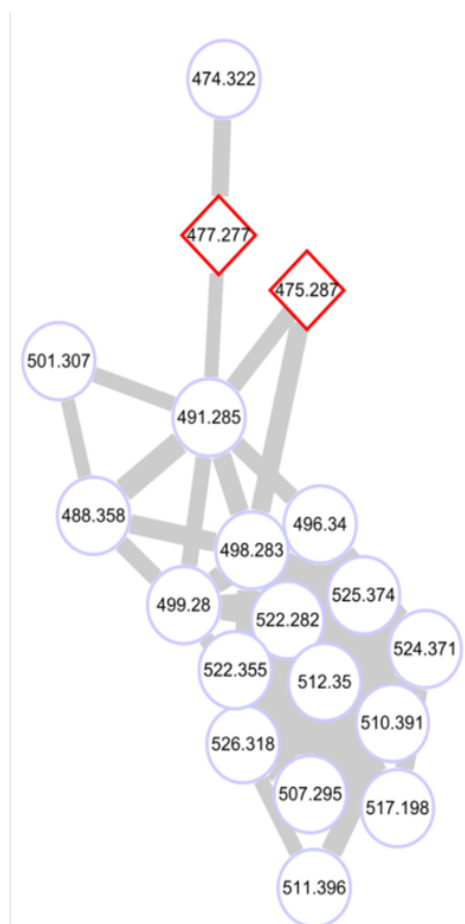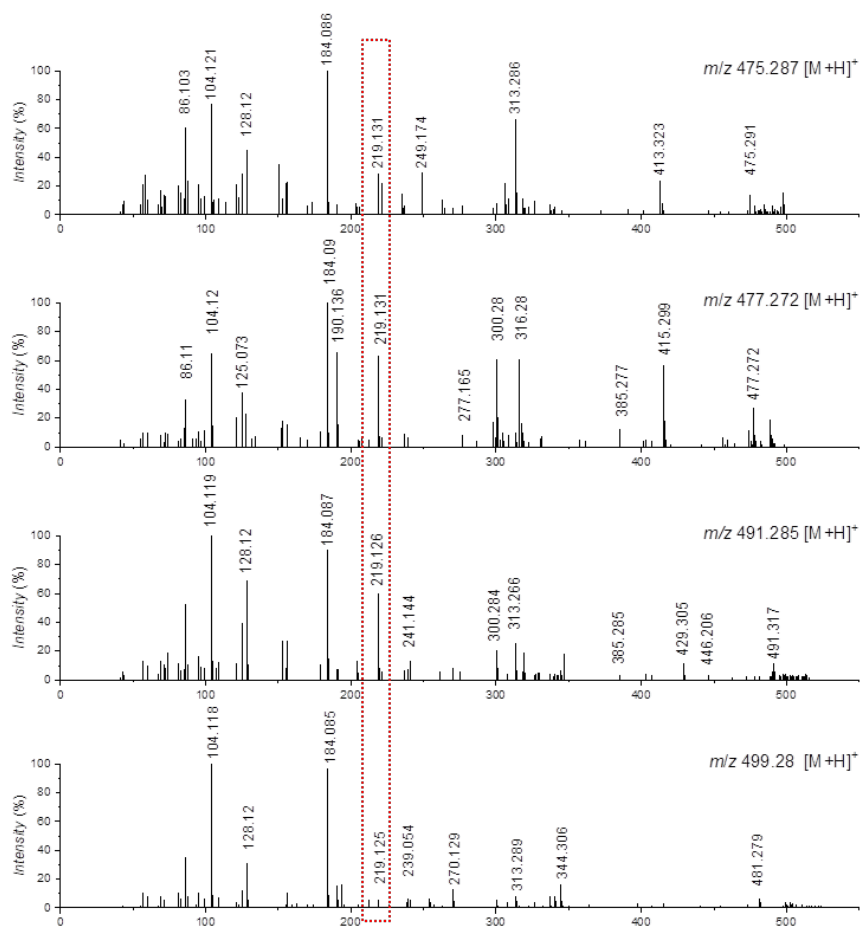

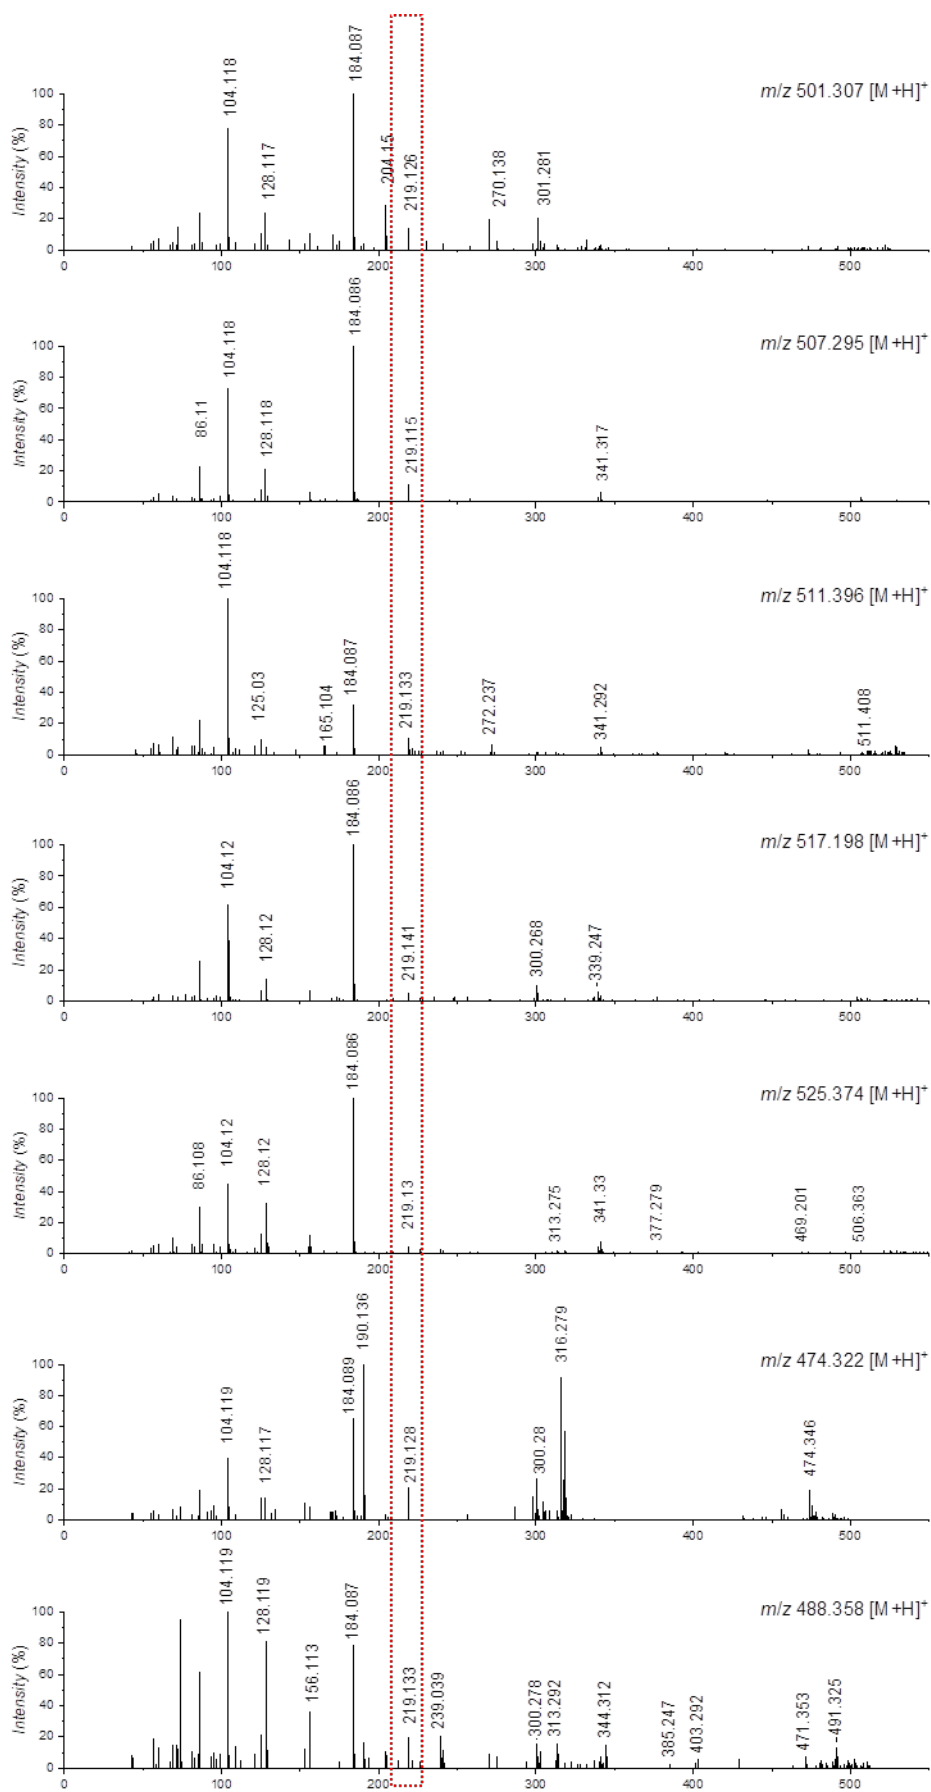

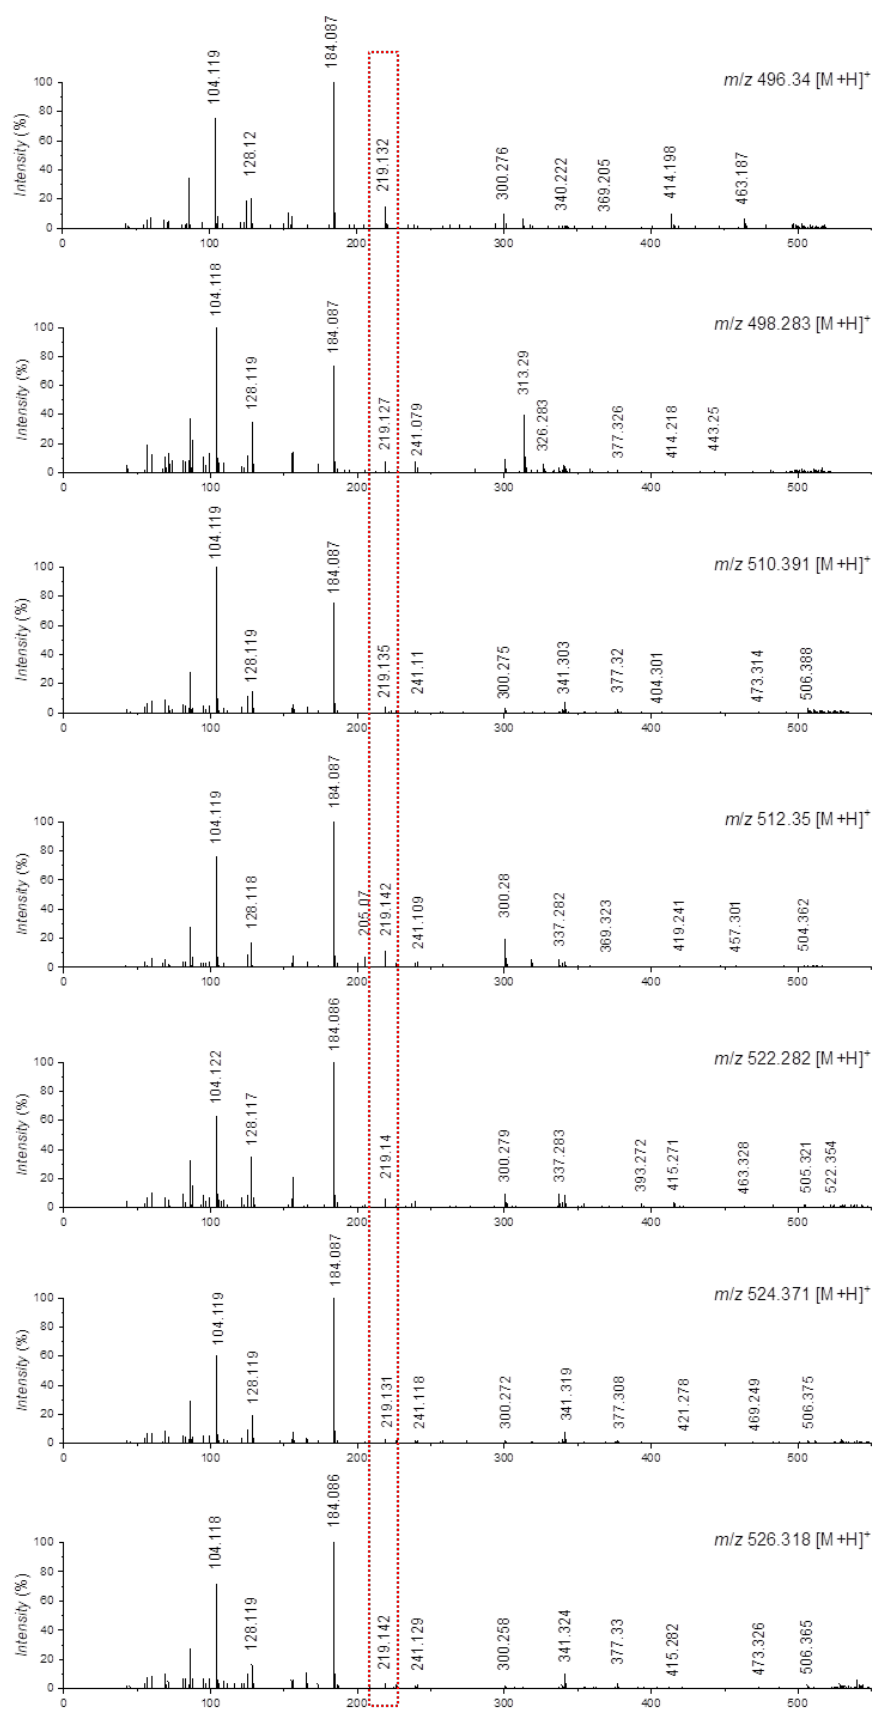

**Figure S2.** Cyclotetrapeptides -cluster and the MS/MS spectrum of each node

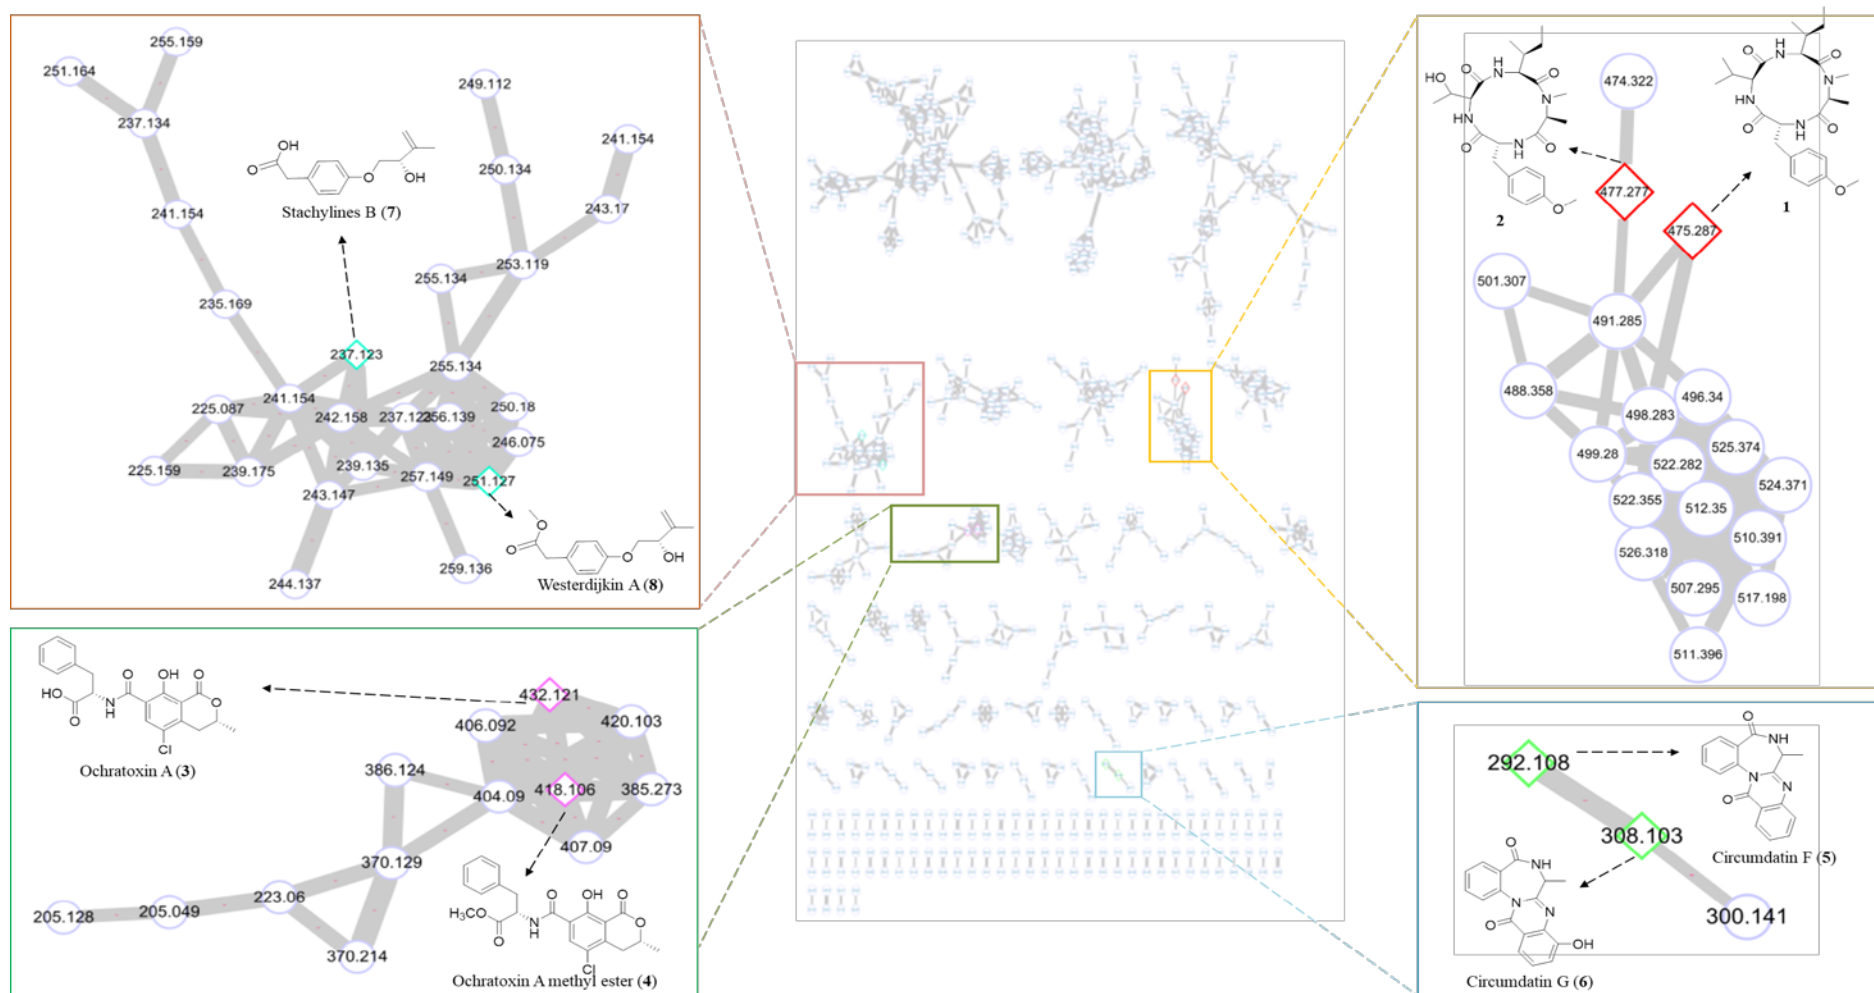

**Figure S3.** The cluster corresponding to compounds observed in the molecular networking



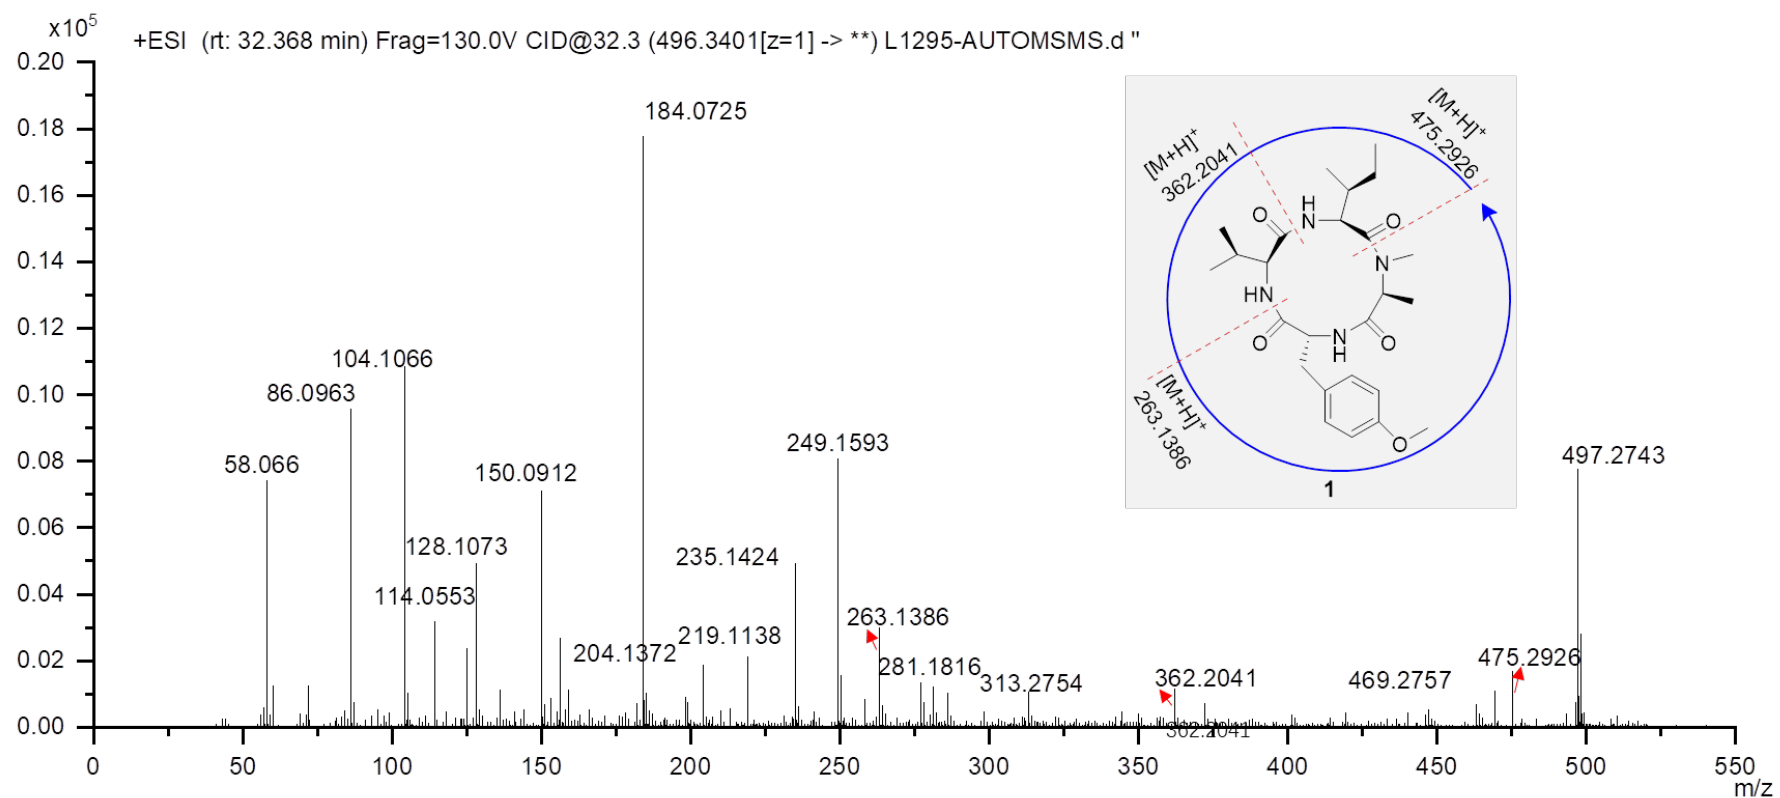

**Figure S4.** The ESI-MS/MS spectrum of **1**.

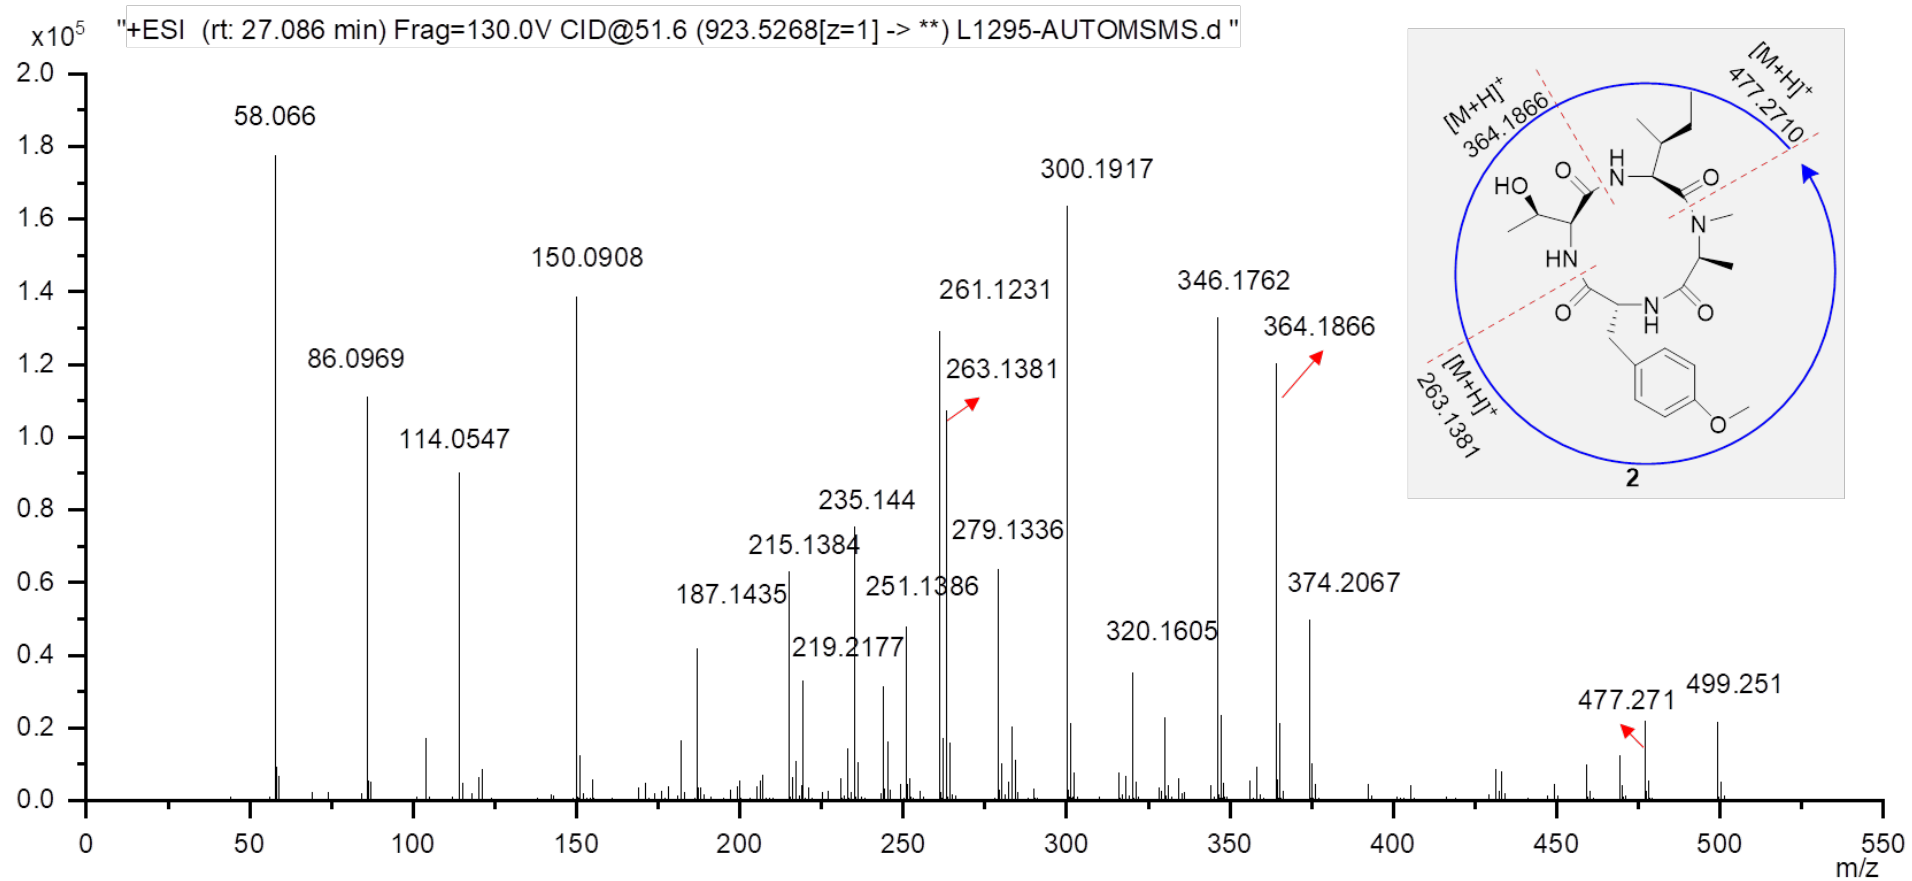

Figure S5. The ESI-MS/MS spectrum of 2.

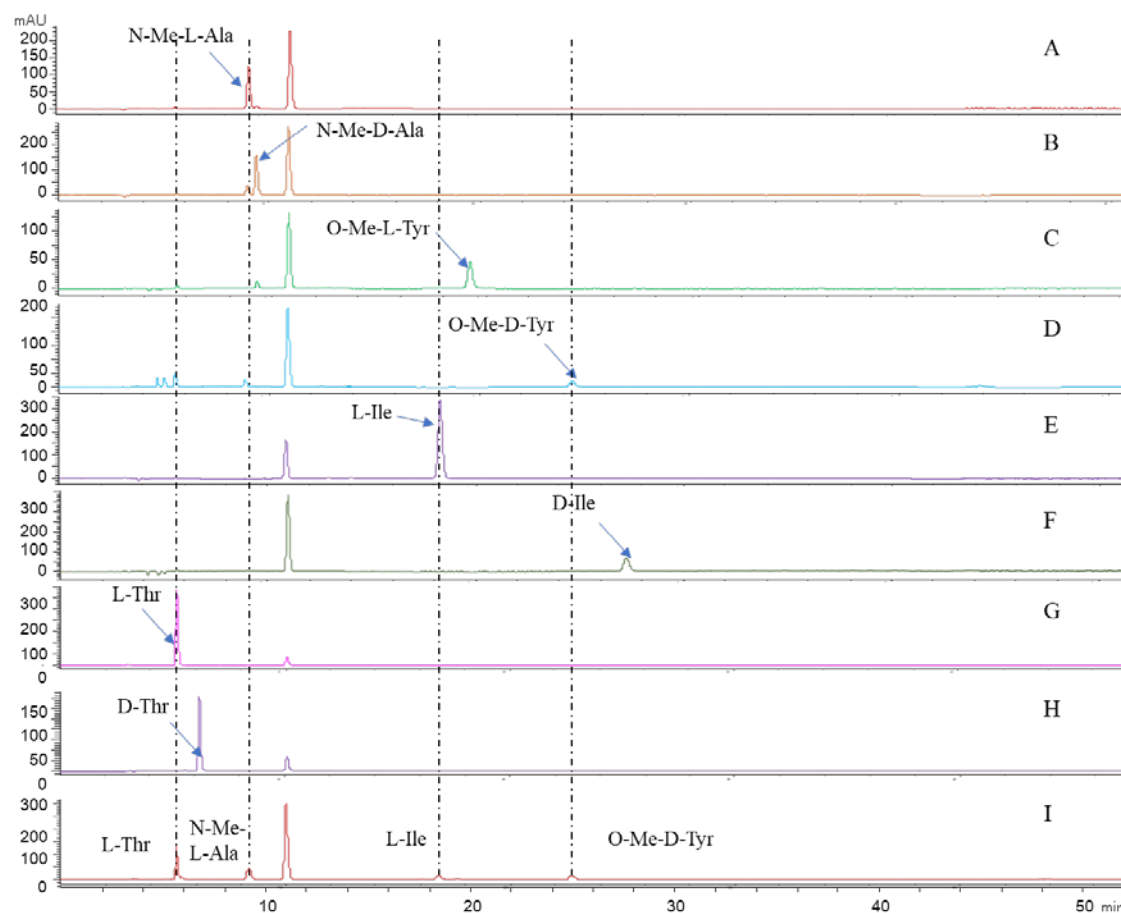

**Figure S6.** Advanced Marfey's analysis of compound **2**. (A-H): The retention times for the FDAA derivatives of *N*-Me-L-Ala, *N*-Me-D-Ala, *O*-Me-L-Tyr, *O*-Me-D-Tyr, L-Ile, D-Ile, L-Thr, and D-Thr, respectively. (I): The FDAA derivatives of the hydrolysate of **2**. The derivatives of the acid hydrolysate and the standard amino acids were subjected to RP HPLC analysis (Kromasil C18 column; 5  $\mu$ m, 4.6  $\times$  250mm; 1.0 mL/min; UV detection at 340 nm) with a linear gradient of acetonitrile (35%-45%) in water (TFA, 0.01%) over 40 min.

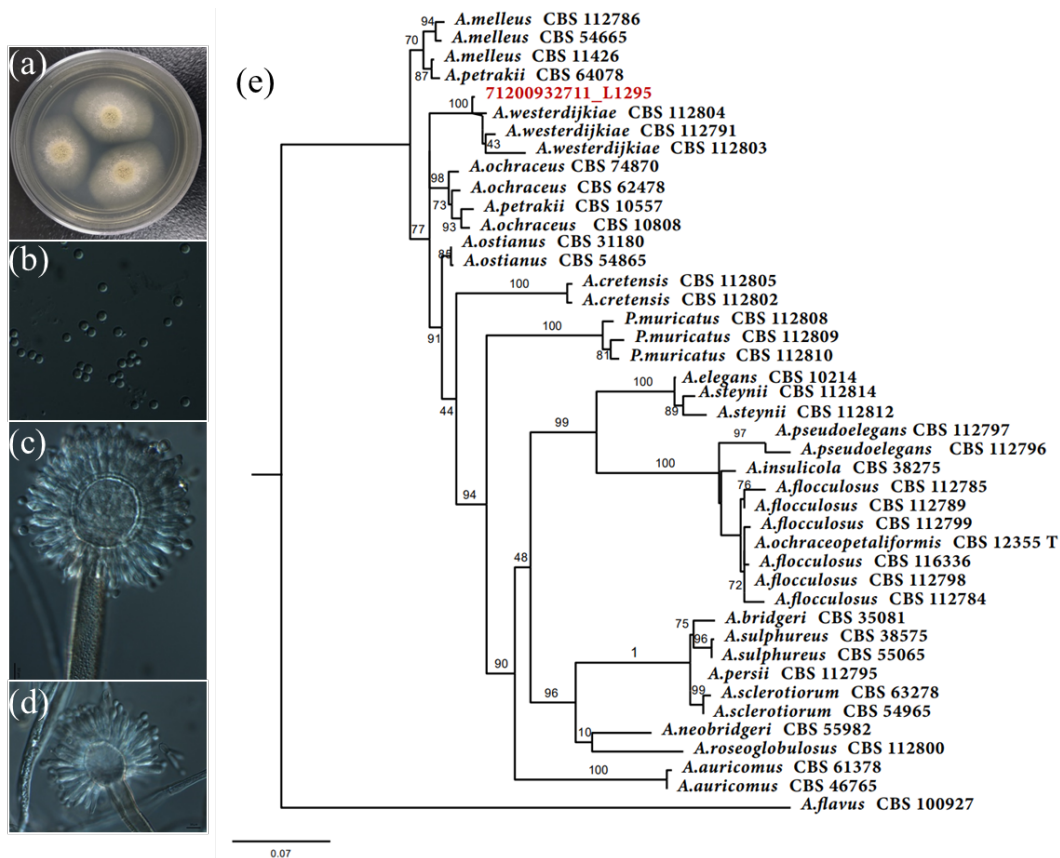

**Figure S7.** Phylogenetic analysis and morphological characters of *Aspergillus westerdijkiae* (a): Colonies on PDA after 7 d; (b): Conidiophores; (c-d): Conidia. Scale bars: b–d = 10  $\mu$ m; (e). Phylogenetic analysis of *A. westerdijkiae* based on  $\beta$ -tubulin dataset.

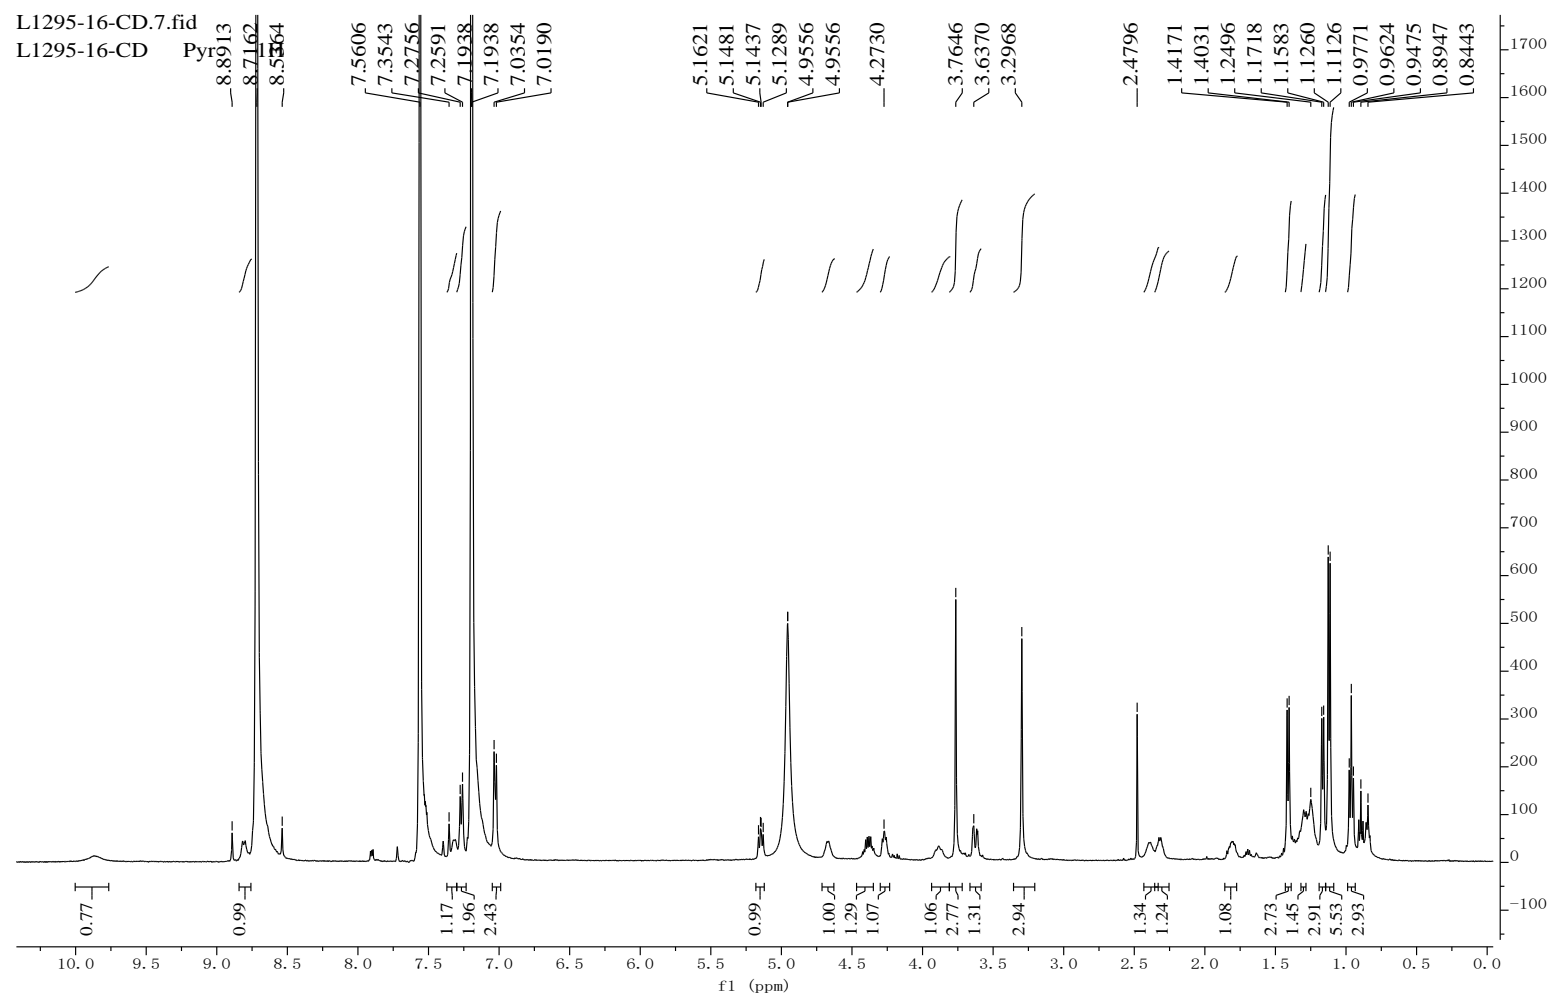

**Figure S8.**  $^1\text{H}$  NMR spectrum of westertide A (**1**) in Pyridine- $d_5$  (500 MHz)

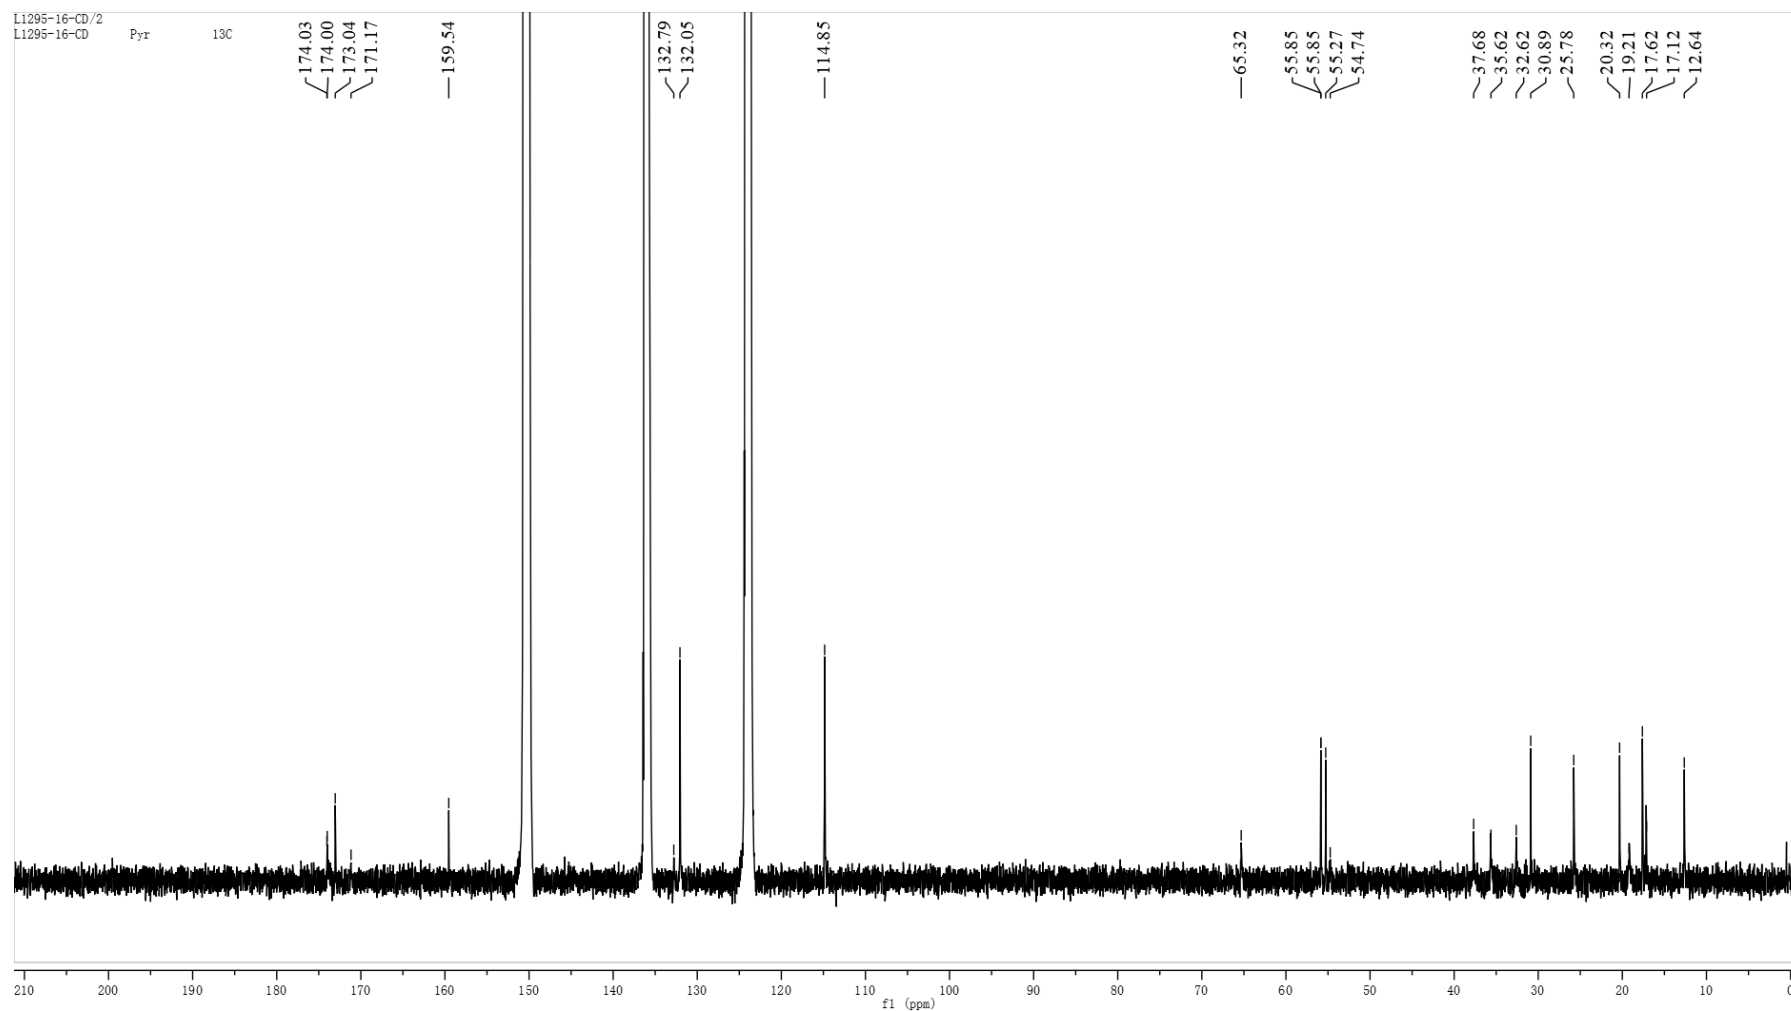

**Figure S9.**  $^{13}\text{C}$  NMR spectrum of westertide A (**1**) in Pyridine- $d_5$  (125 MHz)

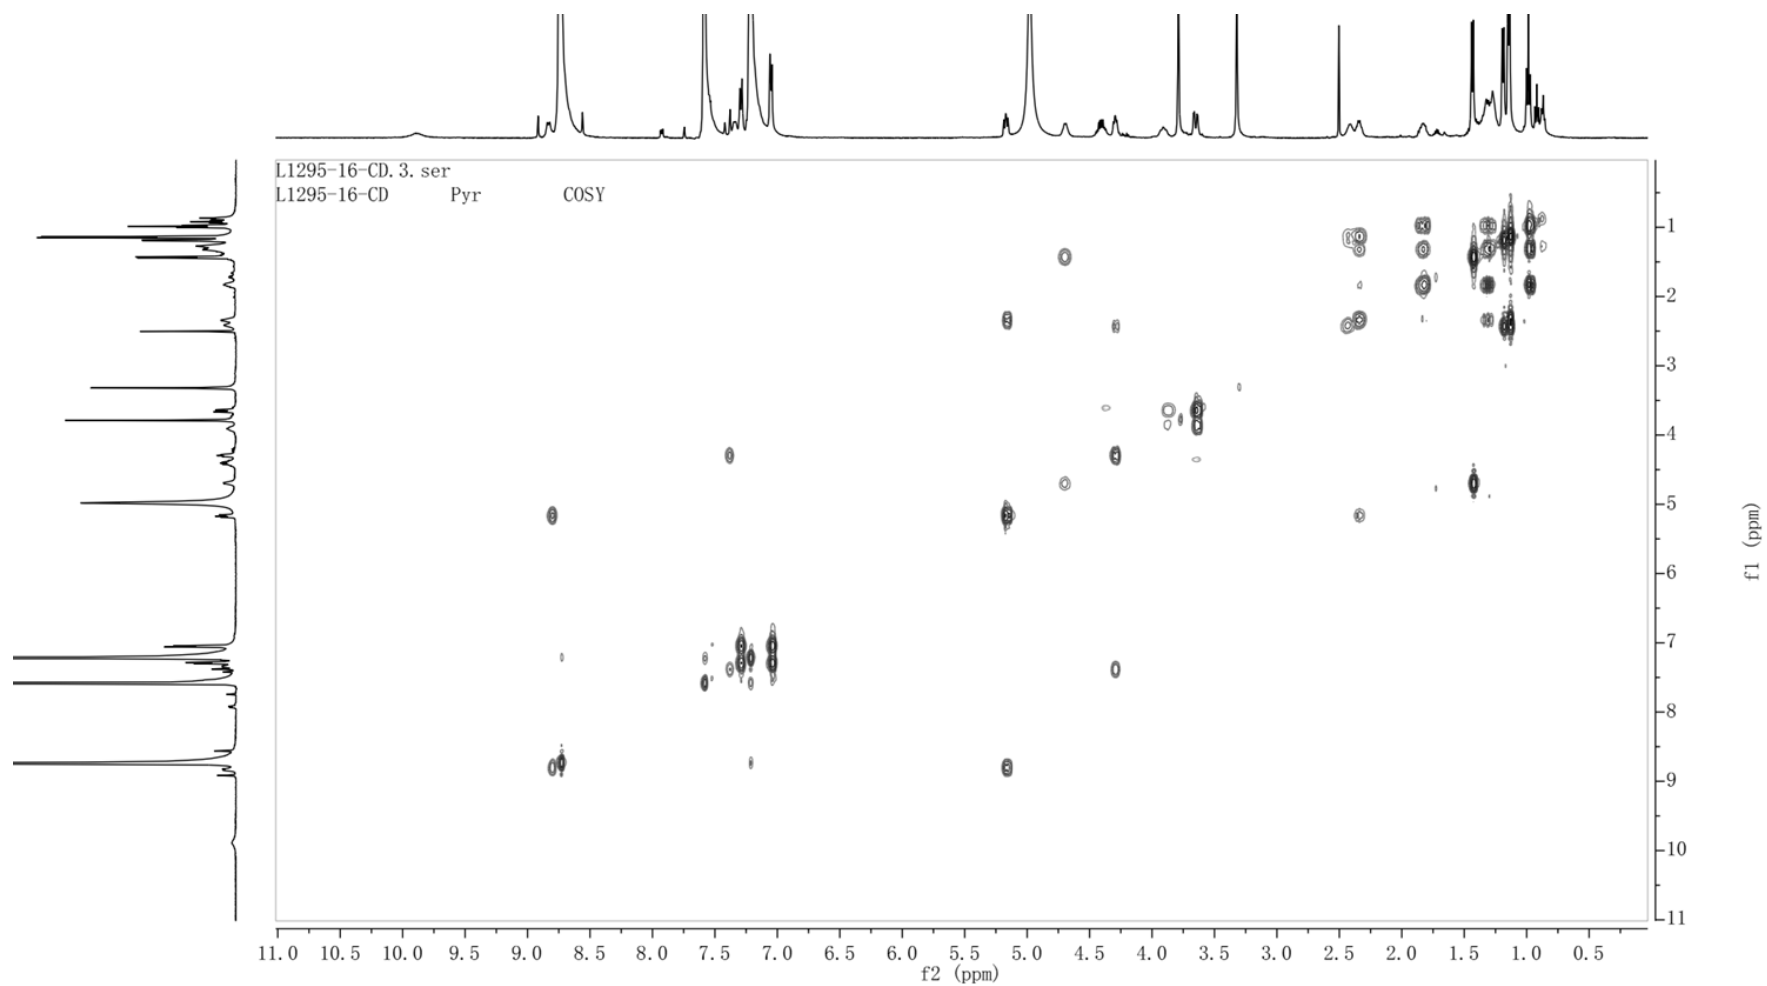

**Figure S10.**  $^1\text{H}$ - $^1\text{H}$  COSY spectrum of westertide A (**1**) in Pyridine- $d_5$

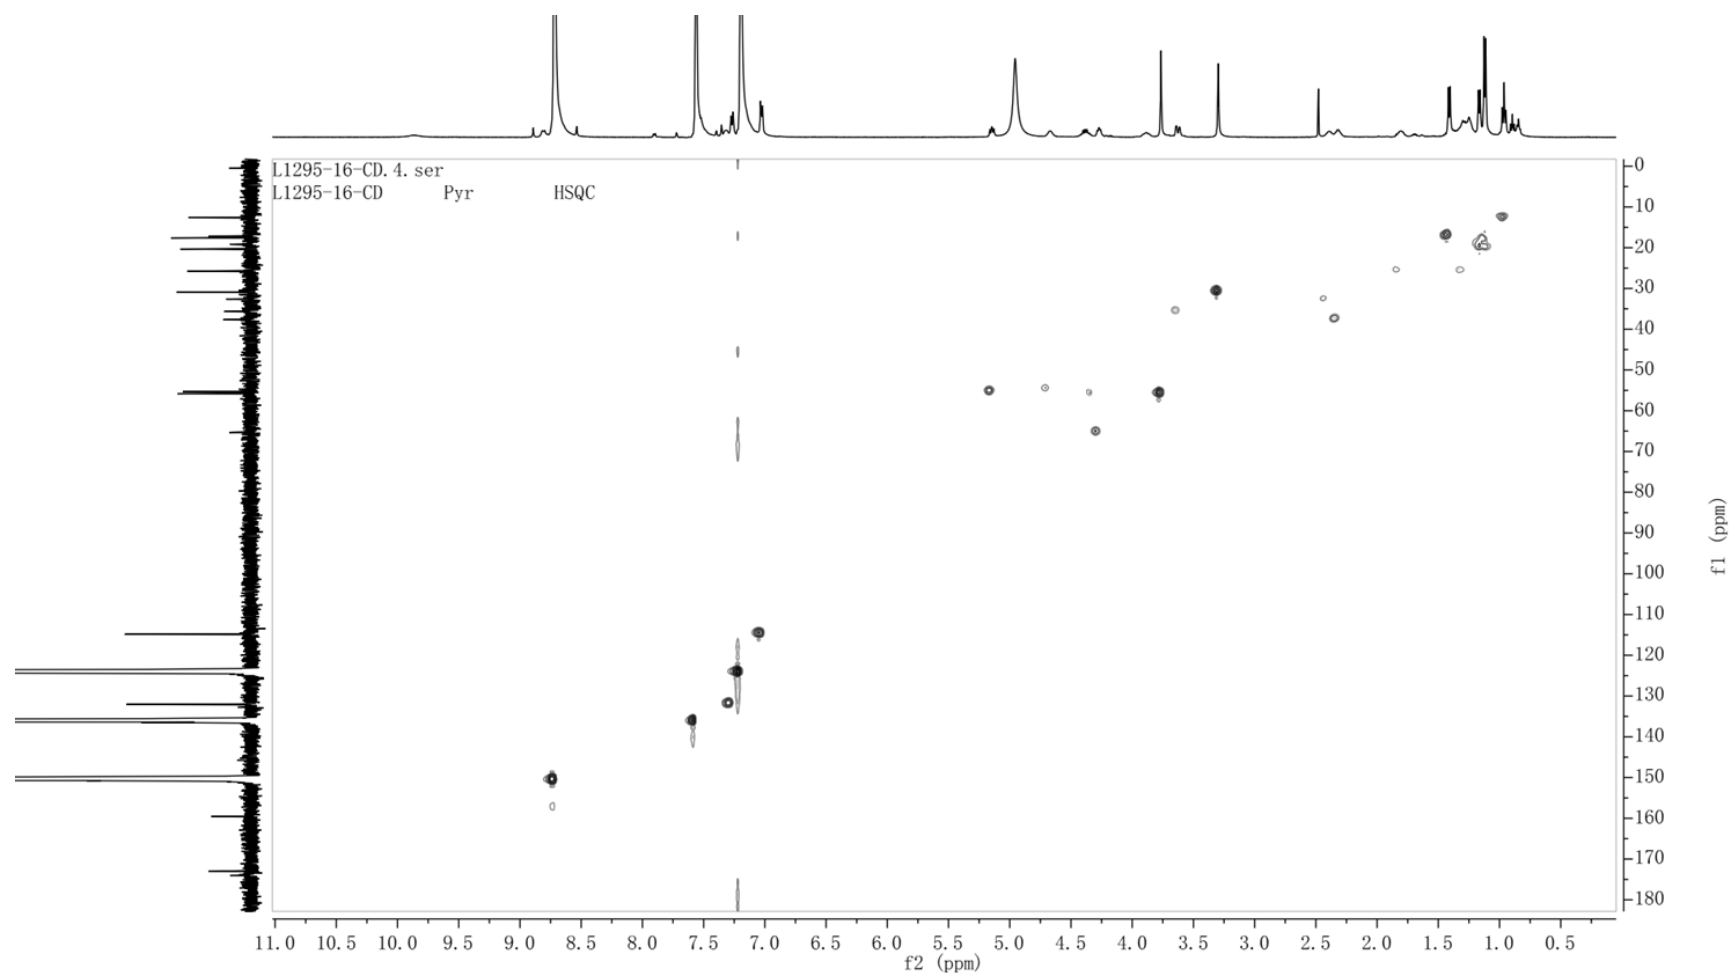

**Figure S11.** HSQC spectrum of westertide A (**1**) in Pyridine- $d_5$



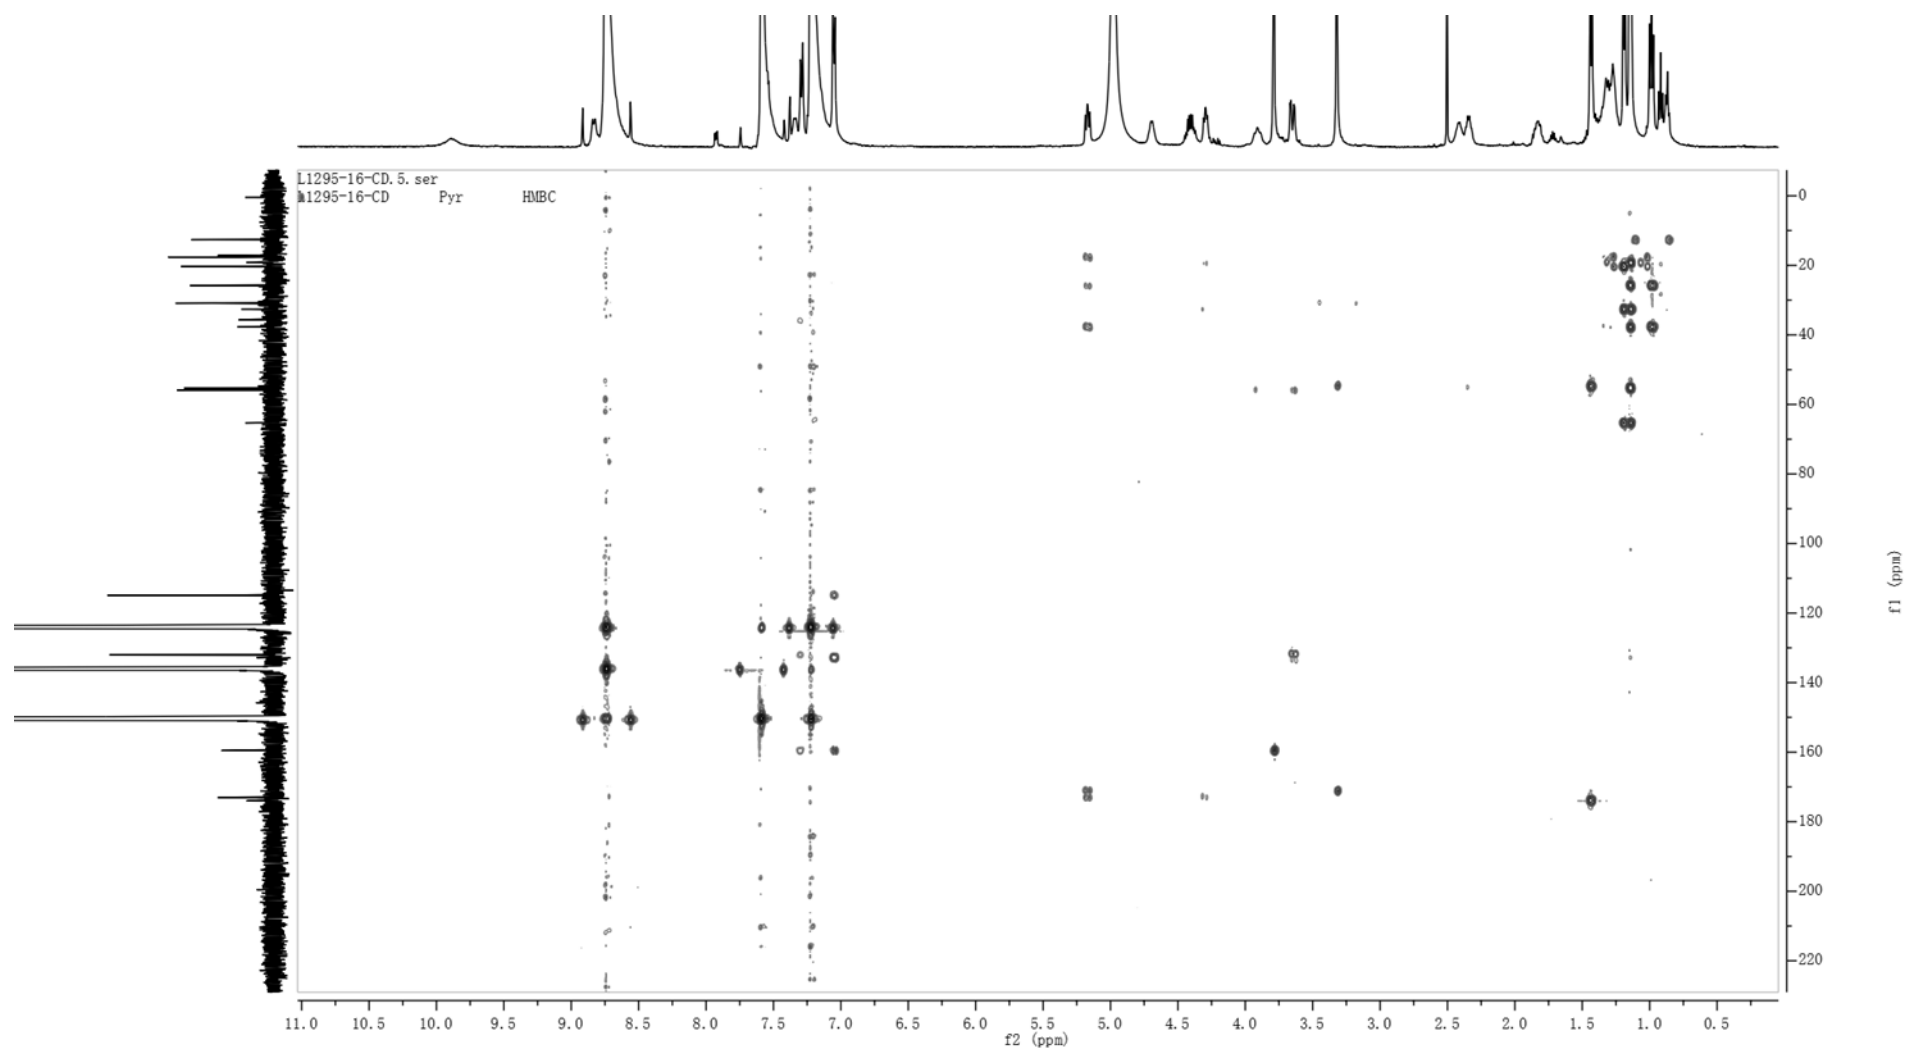

**Figure S12.** HMBC spectrum of westertide A (**1**) in Pyridine- $d_5$

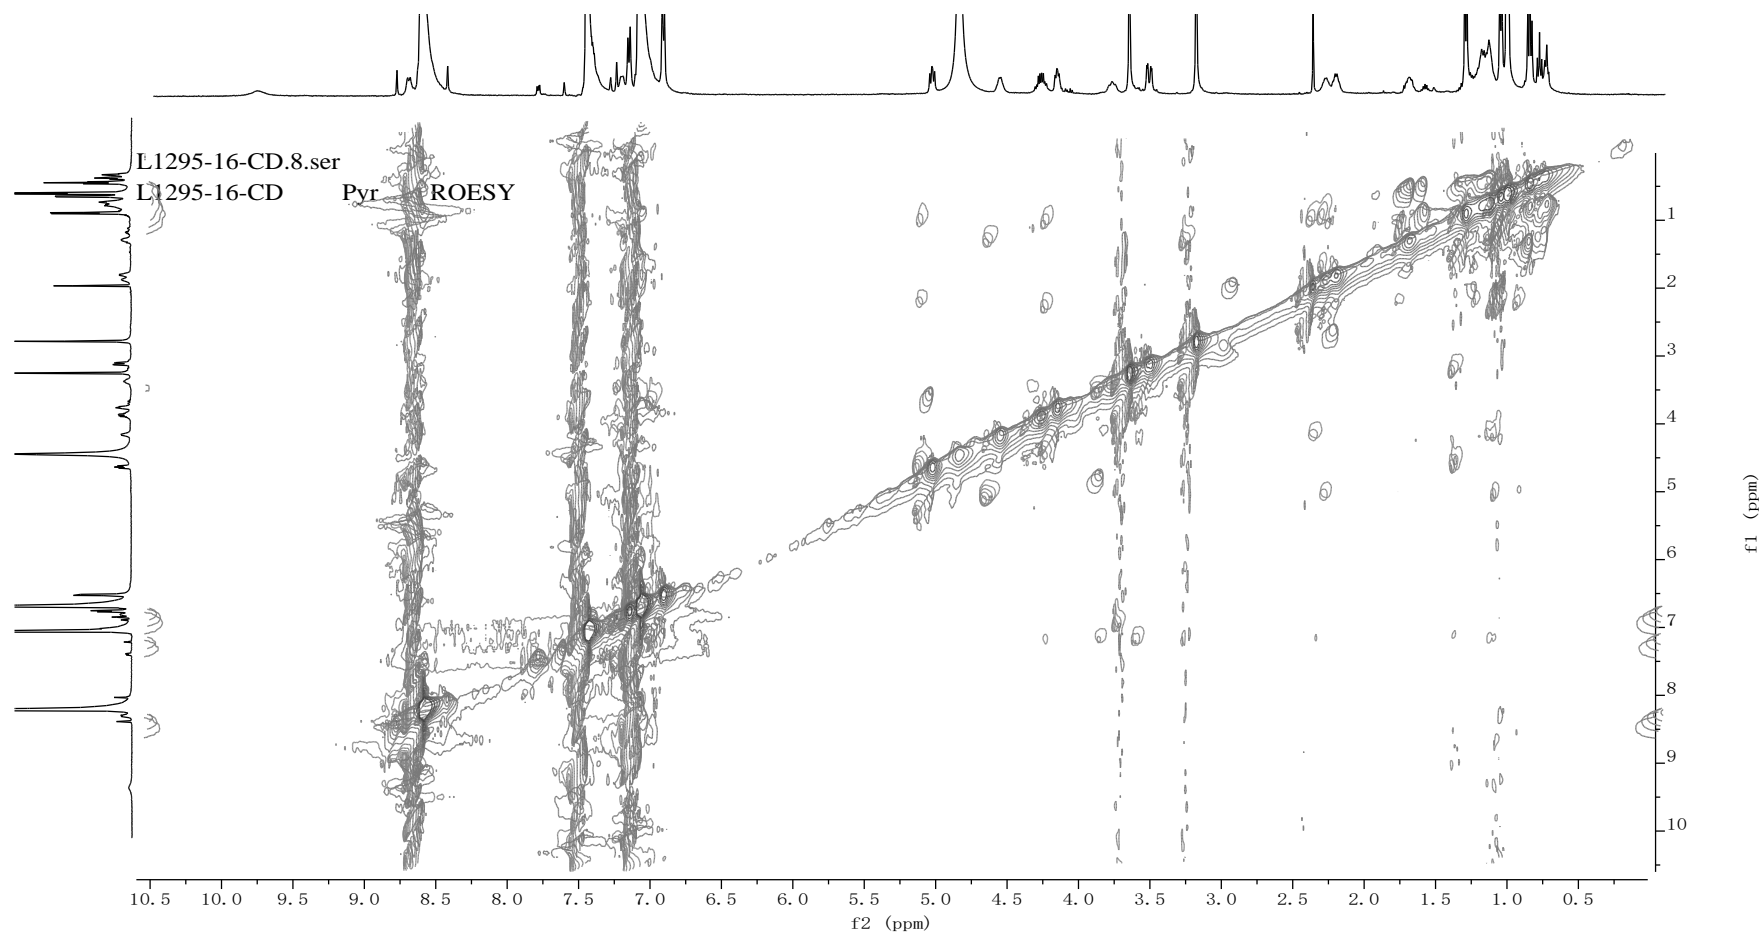

**Figure S13.** NOESY spectrum of westertide A (**1**) in Pyridine- $d_5$

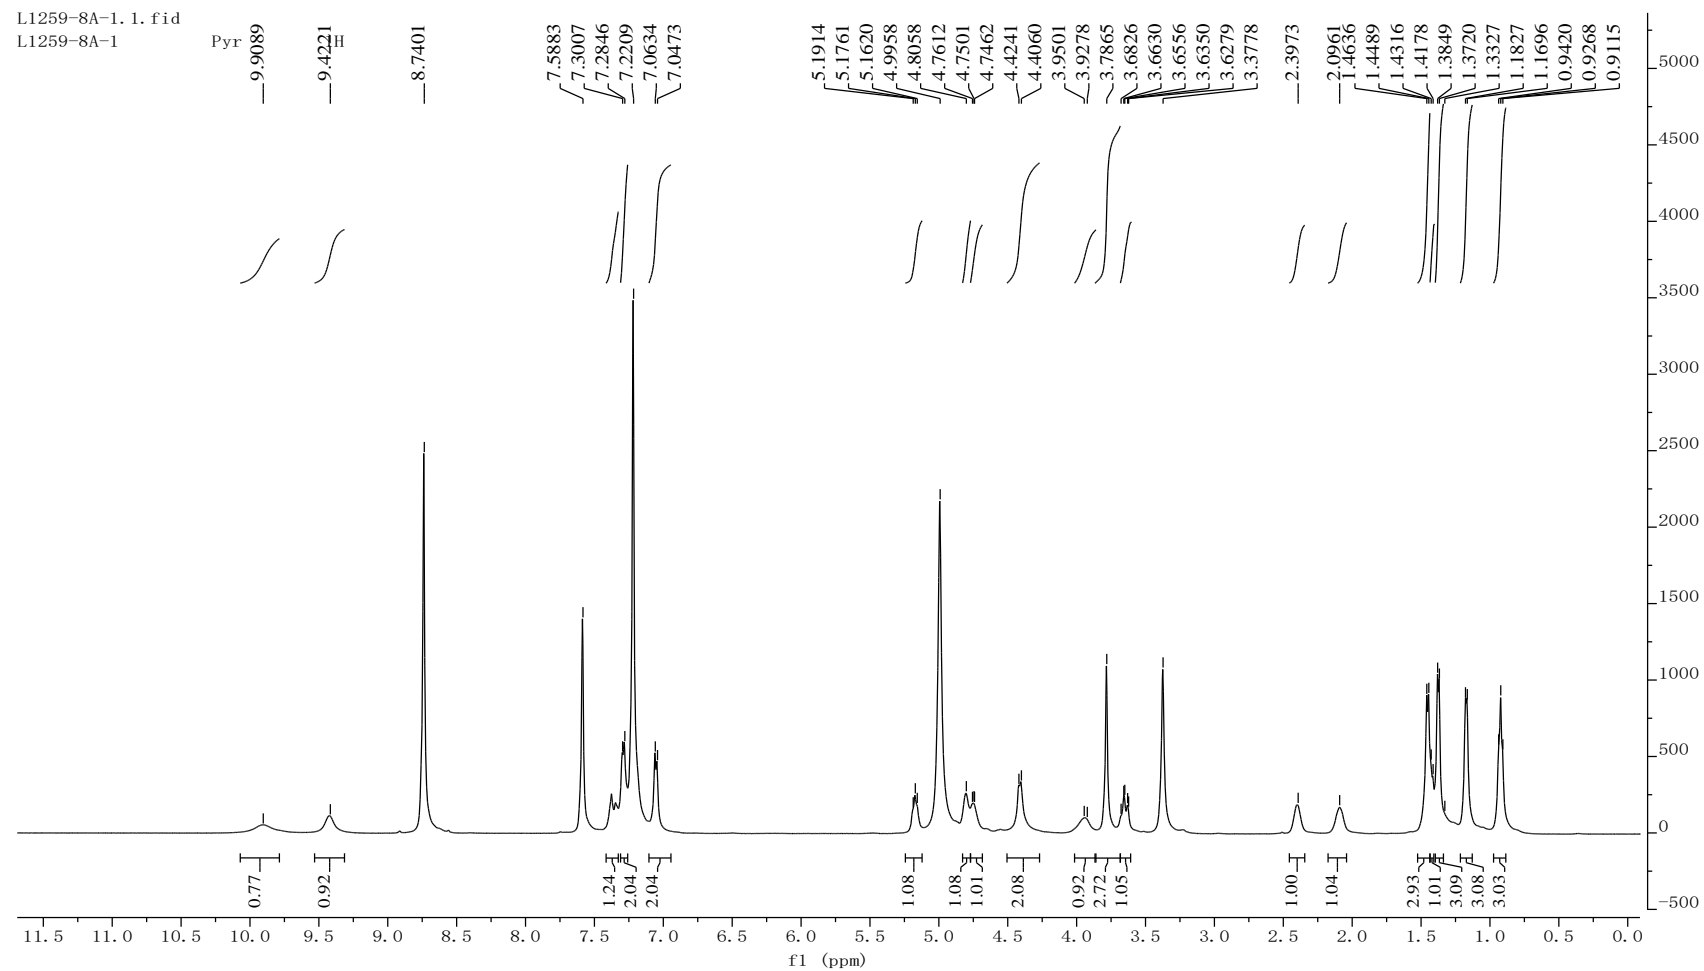

**Figure S14.**  $^1\text{H}$  NMR spectrum of westertide B (**2**) in Pyridine- $d_5$  (500 MHz)

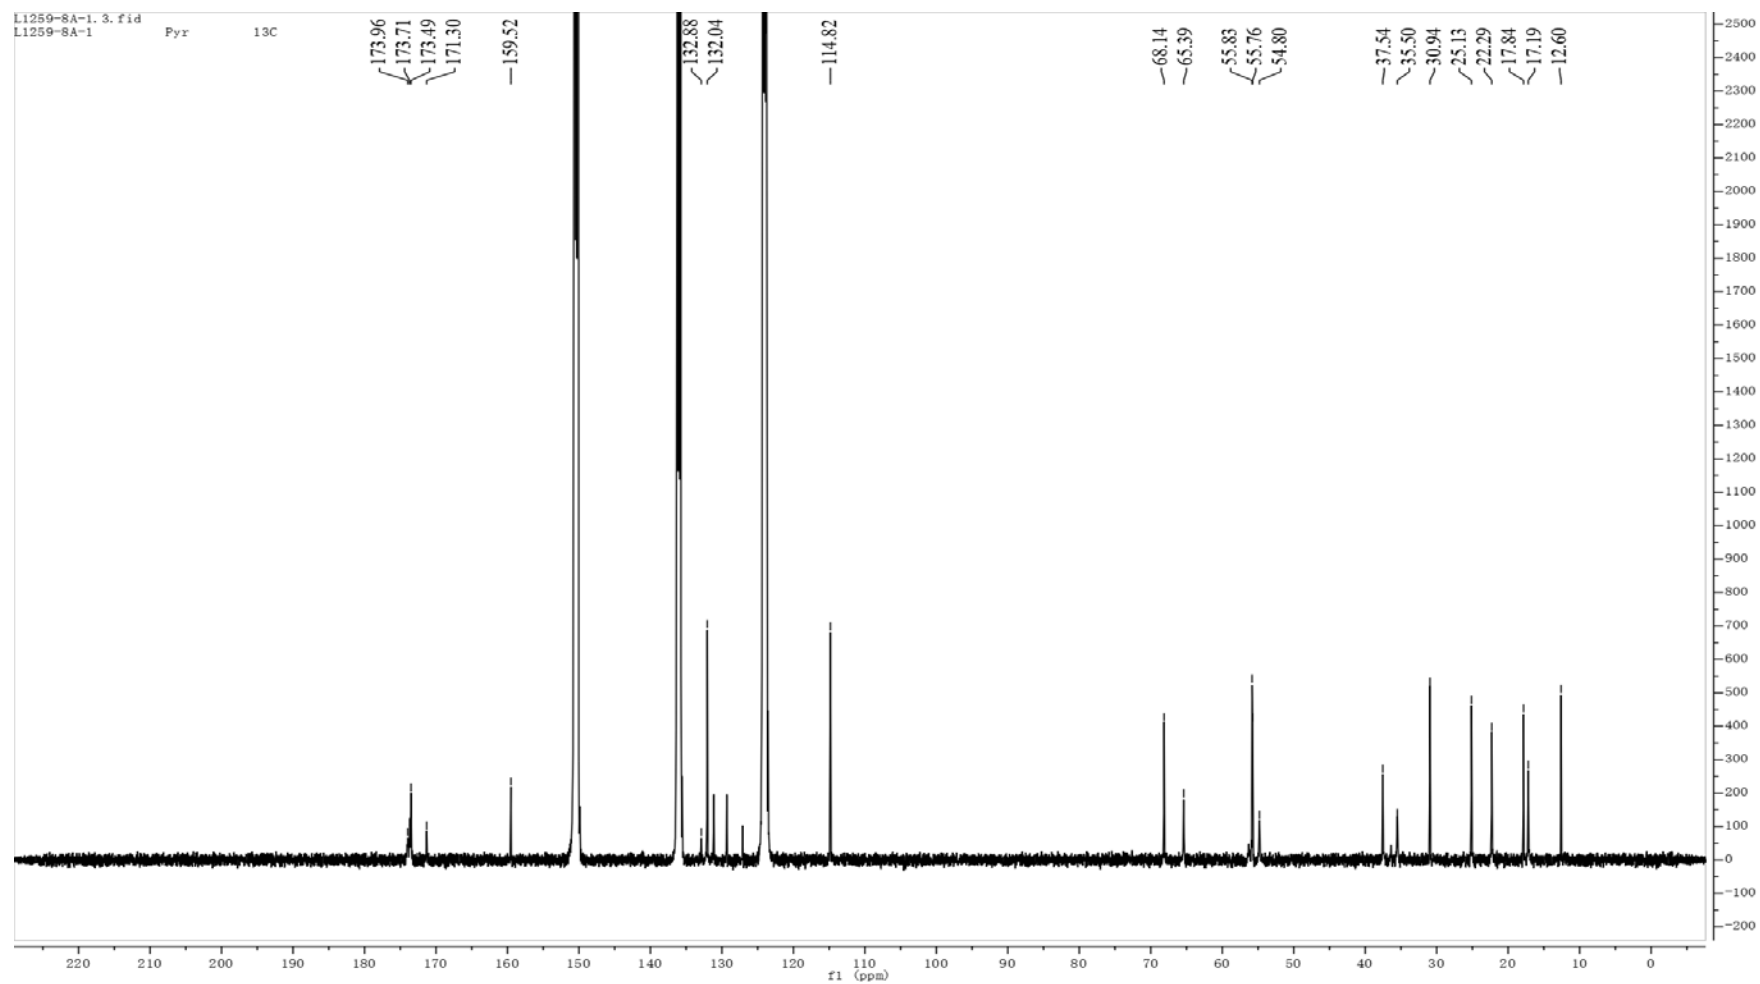

**Figure S15.**  $^{13}\text{C}$  NMR spectrum of westertide B (**2**) in Pyridine- $d_5$  (125 MHz)

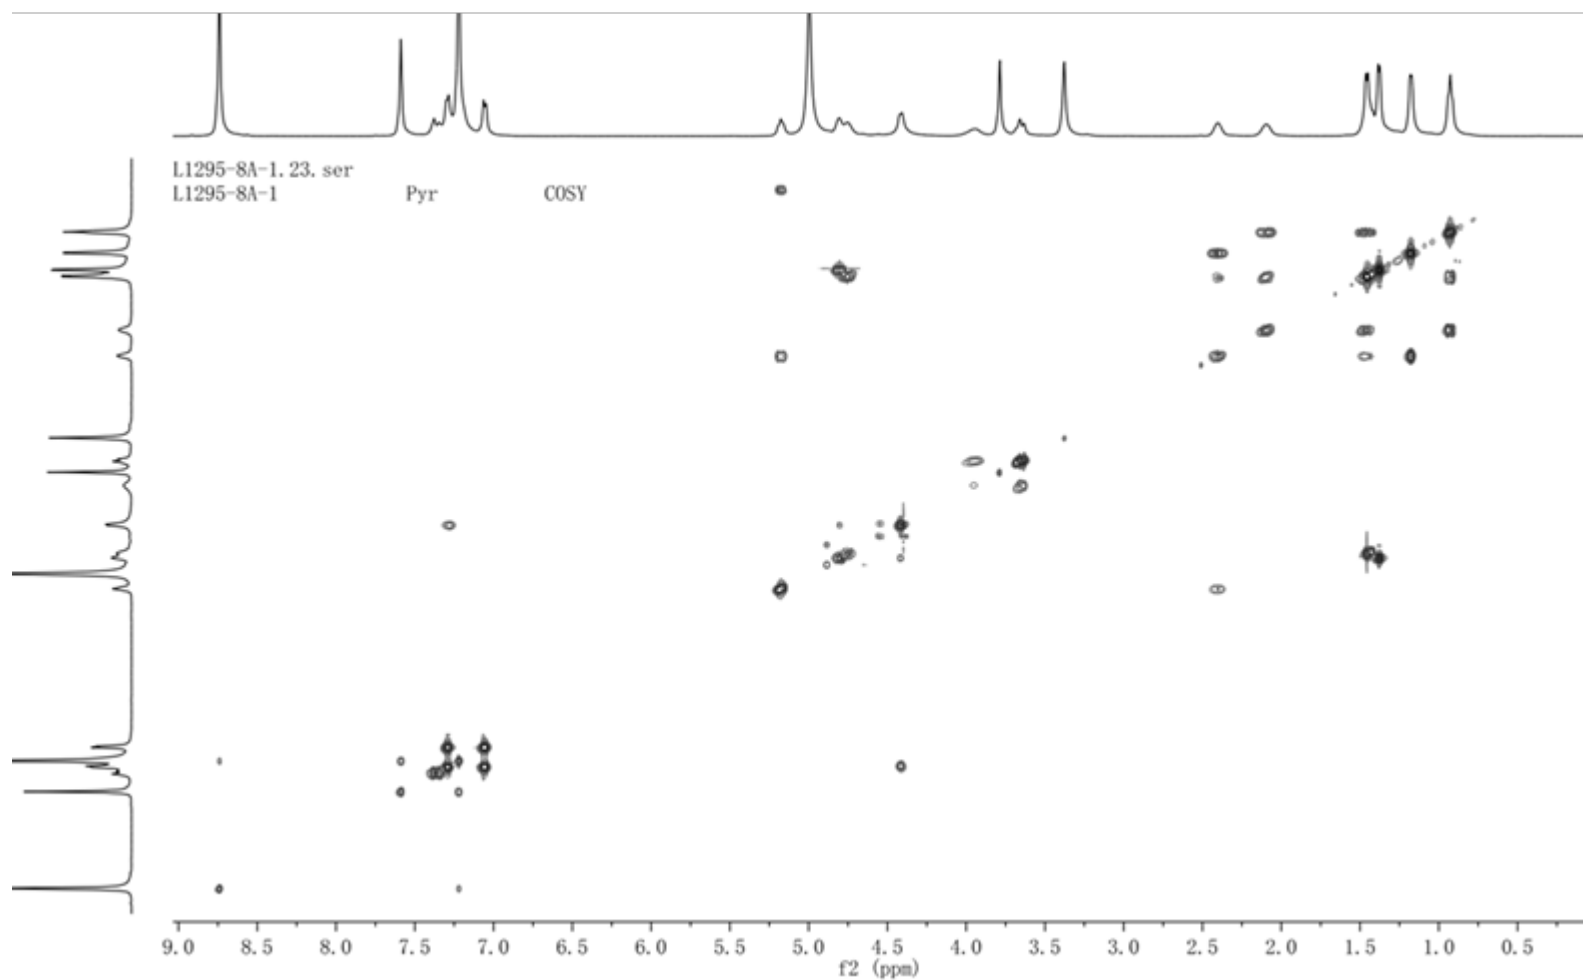

**Figure S16.**  $^1\text{H}$ - $^1\text{H}$  COSY spectrum of westertide B (**2**) in Pyridine- $d_5$

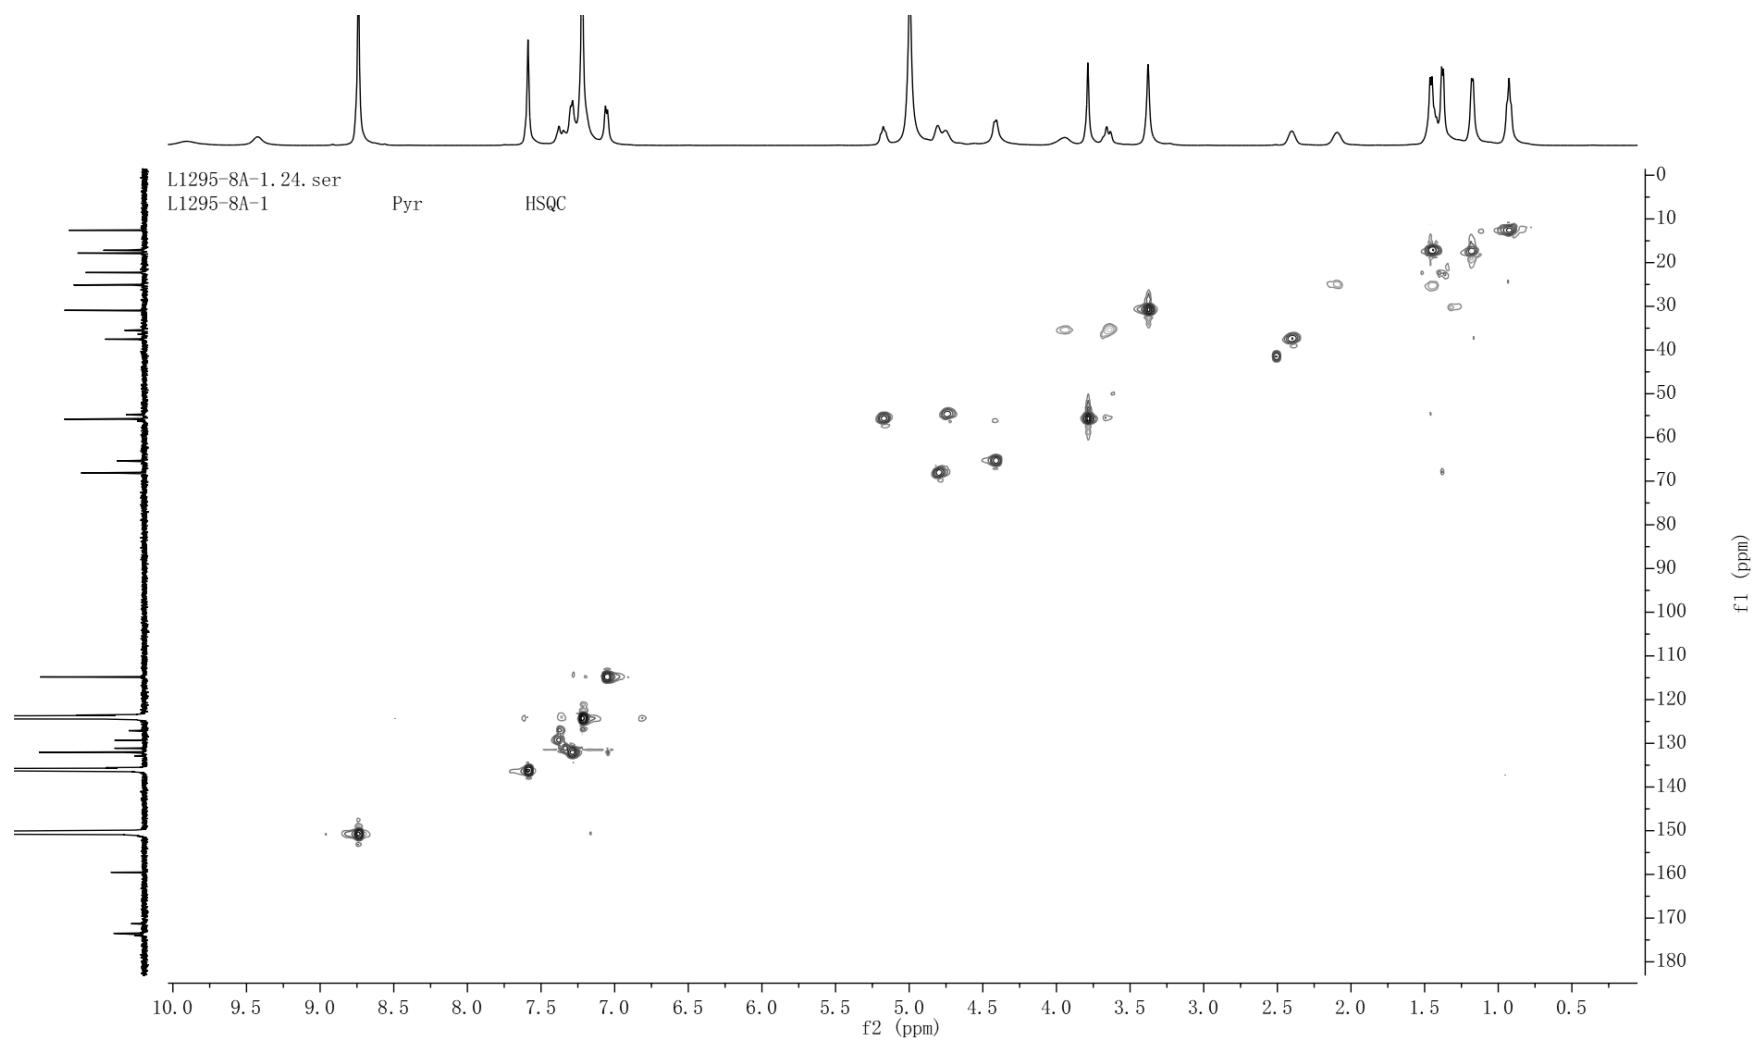

**Figure S17.** HSQC spectrum of westertide B (**2**) in Pyridine-*d*<sub>5</sub>

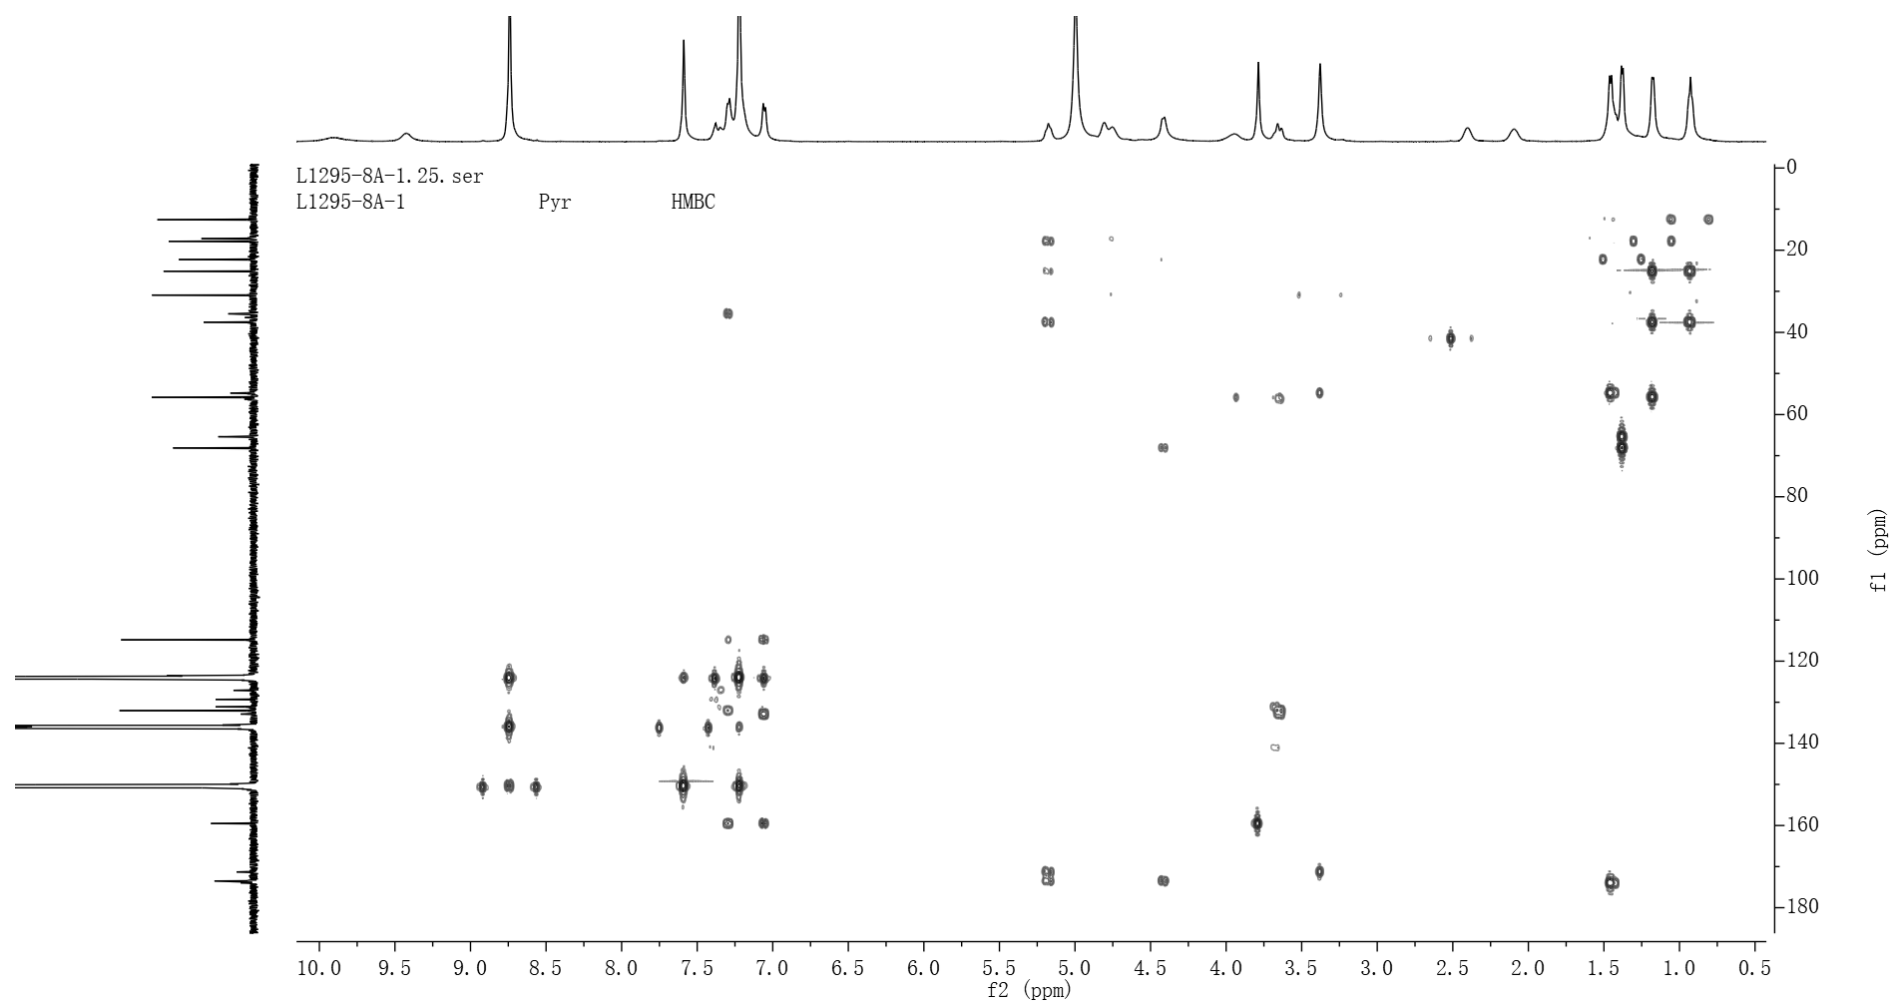

**Figure S18.** HMBC spectrum of westertide B (**2**) in Pyridine-*d*<sub>5</sub>

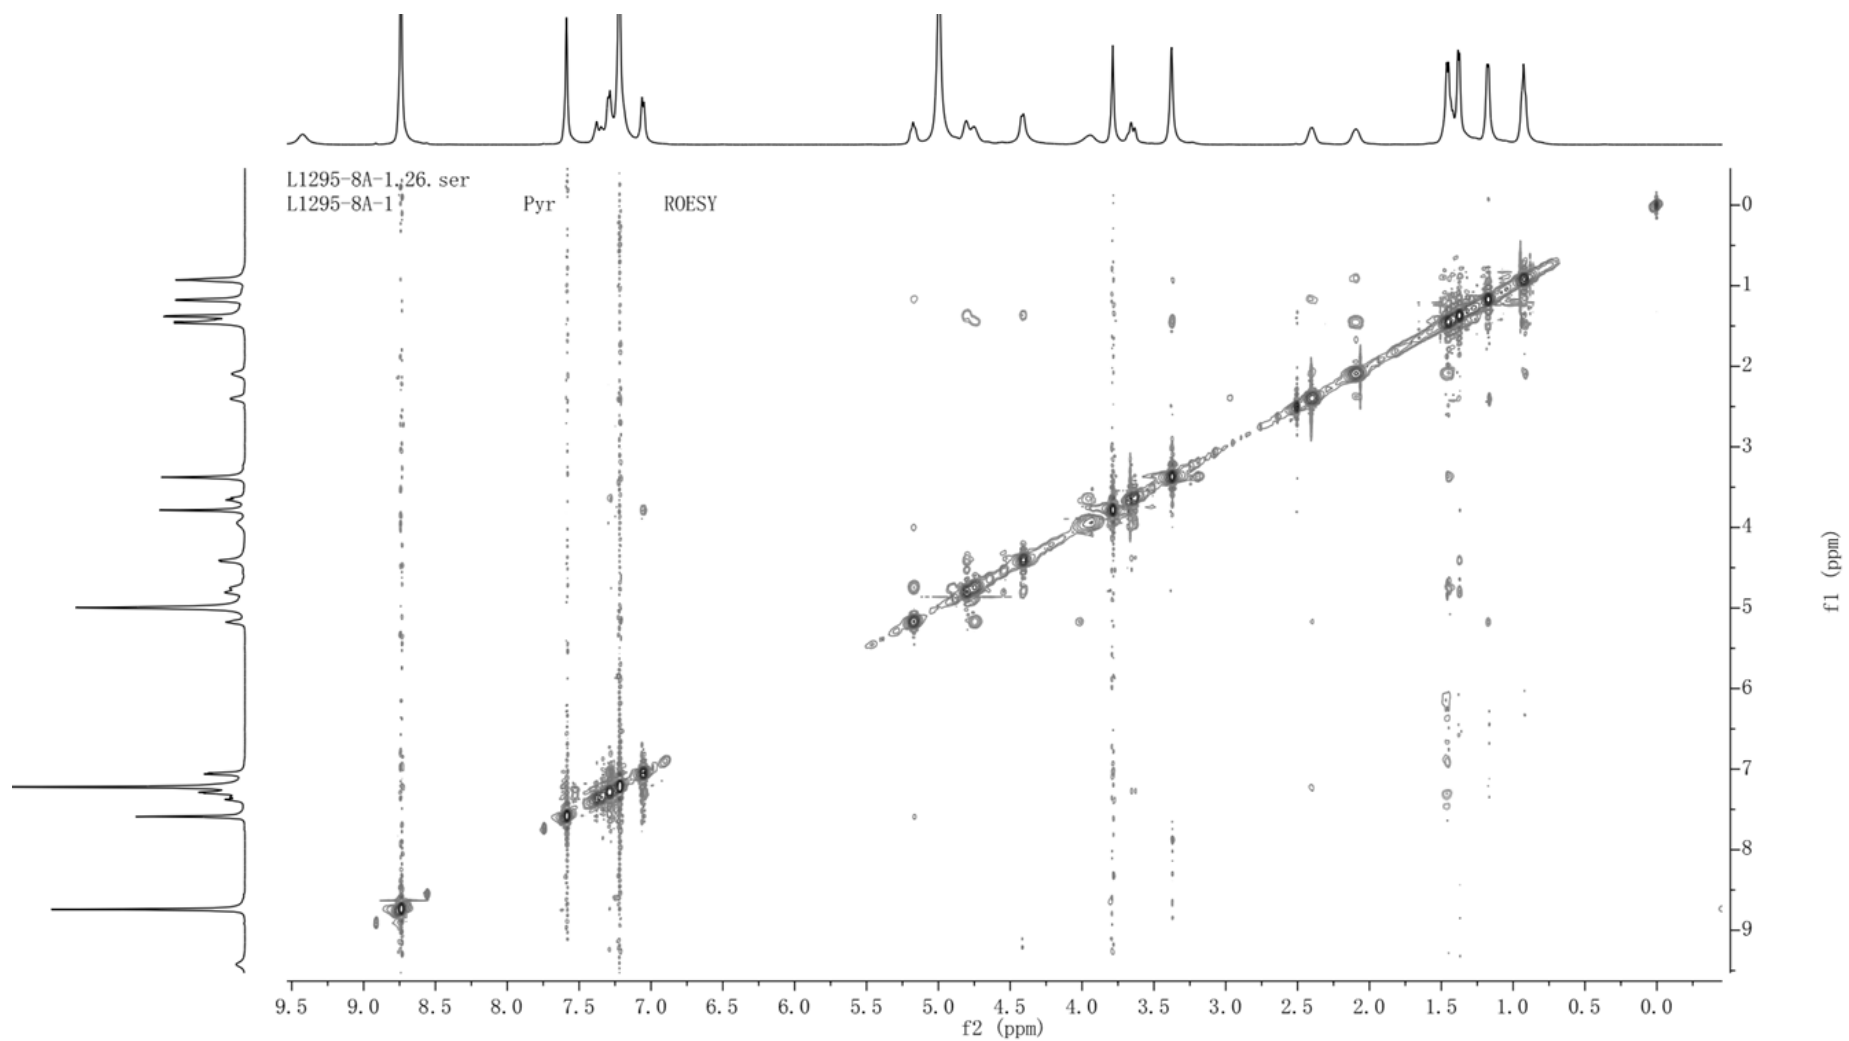

**Figure S19.** NOESY spectrum of westertide B (**2**) in Pyridine- $d_5$
